# Supplementary material for: Early Rhythm Control Therapy in Patients With Atrial Fibrillation and Heart Failure
Source: PubMed Central journal article supplement — Circulation. 2021 Jul 30;144(11):845–58. doi: 10.1161/CIRCULATIONAHA.121.056323 (PMC8456351; doi:10.1161/circulationaha.121.056323), 2021-07-30

## **Early rhythm control therapy in patients with atrial fibrillation and heart failure.**

Andreas Rillig MD<sup>1,2</sup>, Christina Magnussen MD<sup>1,2</sup>, Ann-Katrin Ozga PhD<sup>3</sup>, Anna Suling PhD<sup>3</sup>, Axel Brandes MD<sup>4, 5</sup>, Günter Breithardt MD<sup>6, 7</sup>, A John Camm MD<sup>8</sup>, Harry JGM Crijns MD<sup>9</sup>, Lars Eckardt MD<sup>6,7</sup>, Arif Elvan MD<sup>10</sup>, Andreas Goette MD<sup>6, 11,12</sup>, Michele Gulizia MD<sup>13</sup>, Laurent Haegeli MD<sup>14, 15</sup>, Hein Heidbuchel MD<sup>16</sup>, Karl-Heinz Kuck MD<sup>2, 6, 17</sup>, Andre Ng MD<sup>18</sup>, Lukasz Szumowski MD<sup>19</sup>, Isabelle van Gelder MD<sup>20</sup>, Karl Wegscheider MD<sup>2,3,6</sup>, Paulus Kirchhof MD<sup>1, 2, 6, 21</sup>

<sup>1</sup> Department of Cardiology, University Heart and Vascular Center, University Medical Center Hamburg–Eppendorf, Germany

<sup>2</sup> German Center for Cardiovascular Research, Partner Site Hamburg/Luebeck/Kiel, Germany

<sup>3</sup> Institute of Medical Biometry and Epidemiology, University Medical Center Hamburg–Eppendorf, Germany

<sup>4</sup> Department of Cardiology, Odense University Hospital, Denmark

<sup>5</sup> Department of Clinical Research, University of Southern Denmark, Odense, Denmark

<sup>6</sup> Atrial Fibrillation Network (AFNET), Münster, Germany

<sup>7</sup> Department of Cardiology II (Electrophysiology), University Hospital Münster, Germany

<sup>8</sup> Cardiology Clinical Academic Group, Molecular and Clinical Sciences Research Institute, St. George's University of London, UK

<sup>9</sup> Department of Cardiology, Maastricht University Medical Center and Cardiovascular Research Institute Maastricht, Netherlands

<sup>10</sup> Isala Hospital and Diagram Research, Zwolle, The Netherlands

<sup>11</sup> St. Vincenz Hospital, Paderborn, Germany

<sup>12</sup> Working Group of Molecular Electrophysiology, University Hospital Magdeburg, Germany

<sup>13</sup> Garibaldi-Nesima-Hospital, Catania, Italy

<sup>14</sup> University Hospital Zurich, Zurich, Switzerland

<sup>15</sup> Division of Cardiology, Medical University Department, Kantonsspital Aarau, Switzerland

<sup>16</sup> University Hospital Antwerp and Antwerp University, Antwerp, Belgium

<sup>17</sup> LANS Cardio, Hamburg, Germany

<sup>18</sup> Department of Cardiovascular Sciences, University of Leicester, National Institute for Health Research Leicester Biomedical Research Centre, Glenfield Hospital, Leicester, UK

<sup>19</sup> Arrhythmia Center of the National Institute of Cardiology; Medical Division of Cardinal Stefan Wyszyński University in Warsaw. Warsaw, Poland

<sup>20</sup> University of Groningen, University Medical Center Groningen, Groningen, Netherlands

<sup>21</sup> Institute of Cardiovascular Sciences, University of Birmingham, Birmingham, UK

### **Correspondence to**

Paulus Kirchhof, MD

Department of Cardiology

University Heart and Vascular Center UKE Hamburg

Martinstraße 52

20246 Hamburg, Germany

Email [p.kirchhof@uke.de](mailto:p.kirchhof@uke.de)

Phone +49 40 741053824

# SUPPLEMENTAL MATERIAL

## Early rhythm control in patients with heart failure

### Supplemental Tables

**Supplemental Table I.** Characteristics of EAST-AFNET4 heart failure patients as defined per left ventricular ejection fraction subgroup

|                                                        | Early rhythm control. reduced (N=57) | Usual care. reduced (N=75) | Early rhythm control. mid-range (N=110) | Usual care. mid-range (N=101) | Early rhythm control. preserved (N=224) | Usual care. preserved (N=218) | Total (N=785)     |
|--------------------------------------------------------|--------------------------------------|----------------------------|-----------------------------------------|-------------------------------|-----------------------------------------|-------------------------------|-------------------|
| <b>Sex</b>                                             |                                      |                            |                                         |                               |                                         |                               |                   |
| Male                                                   | 43 (75.4%)                           | 61 (81.3%)                 | 82 (74.5%)                              | 77 (76.2%)                    | 111 (49.6%)                             | 115 (52.8%)                   | 489 (62.3%)       |
| Female                                                 | 14 (24.6%)                           | 14 (18.7%)                 | 28 (25.5%)                              | 24 (23.8%)                    | 113 (50.4%)                             | 103 (47.2%)                   | 296 (37.7%)       |
| <b>Age</b>                                             |                                      |                            |                                         |                               |                                         |                               |                   |
| means and standard deviation                           | 68.5 (10.1)                          | 70.1 (8.8)                 | 69.3 (9.2)                              | 71.5 (7.8)                    | 69.9 (9.0)                              | 70.0 (9.6)                    | 70.0 (9.1)        |
| Median (Q1, Q3)                                        | 70.0 (62.0, 77.0)                    | 71.0 (64.5, 77.0)          | 70.5 (64.0, 75.8)                       | 73.0 (67.0, 77.0)             | 71.0 (64.0, 76.2)                       | 71.0 (64.0, 76.0)             | 71.0 (65.0, 76.0) |
| range                                                  | 42.0 - 89.0                          | 41.0 - 85.0                | 42.0 - 87.0                             | 51.0 - 89.0                   | 39.0 - 90.0                             | 34.0 - 91.0                   | 34.0 - 91.0       |
| <b>Body Mass Index (calculated) [kg/m<sup>2</sup>]</b> |                                      |                            |                                         |                               |                                         |                               |                   |
| missing variables                                      | 0                                    | 0                          | 0                                       | 0                             | 1                                       | 1                             | 2                 |
| means and standard deviation                           | 29.9 (6.9)                           | 28.8 (5.0)                 | 29.6 (5.8)                              | 29.8 (5.7)                    | 30.0 (6.1)                              | 30.6 (5.6)                    | 30.0 (5.8)        |
| Median (Q1, Q3)                                        | 27.9 (25.4, 32.7)                    | 28.1 (25.6, 31.2)          | 28.7 (25.9, 32.3)                       | 29.2 (26.1, 32.2)             | 29.5 (26.3, 32.8)                       | 29.8 (26.8, 34.2)             | 29.4 (26.2, 33.1) |
| range                                                  | 18.6 - 58.2                          | 18.4 - 40.9                | 19.0 - 52.2                             | 18.8 - 53.3                   | 16.6 - 52.6                             | 18.1 - 48.4                   | 16.6 - 58.2       |
| <b>LVEF at baseline</b>                                |                                      |                            |                                         |                               |                                         |                               |                   |
| means and standard deviation                           | 31.2 (5.5)                           | 31.1 (5.5)                 | 44.3 (2.9)                              | 44.3 (2.8)                    | 60.8 (6.3)                              | 60.8 (6.2)                    | 51.4 (12.7)       |
| Median (Q1, Q3)                                        | 31.0 (30.0, 35.0)                    | 31.0 (30.0, 35.0)          | 45.0 (42.0, 46.0)                       | 45.0 (42.0, 46.0)             | 60.0 (55.0, 65.0)                       | 60.0 (57.2, 65.0)             | 52.0 (43.0, 62.0) |
| range                                                  | 13.0 - 39.0                          | 18.0 - 39.0                | 40.0 - 49.1                             | 40.0 - 49.0                   | 50.0 - 82.0                             | 50.0 - 85.0                   | 13.0 - 85.0       |
| <b>Cardiomyopathy</b>                                  |                                      |                            |                                         |                               |                                         |                               |                   |
| No                                                     | 24 (42.1%)                           | 46 (61.3%)                 | 77 (70.0%)                              | 82 (81.2%)                    | 206 (92.0%)                             | 201 (92.2%)                   | 636 (81.0%)       |
| Tachycardiomyopathy                                    | 9 (15.8%)                            | 7 (9.3%)                   | 10 (9.1%)                               | 3 (3.0%)                      | 6 (2.7%)                                | 2 (0.9%)                      | 37 (4.7%)         |
| Hypertrophic cardiomyopathy                            | 0 (0.0%)                             | 1 (1.3%)                   | 3 (2.7%)                                | 1 (1.0%)                      | 1 (0.4%)                                | 1 (0.5%)                      | 7 (0.9%)          |
| Dilatative cardiomyopathy                              | 11 (19.3%)                           | 14 (18.7%)                 | 11 (10.0%)                              | 9 (8.9%)                      | 2 (0.9%)                                | 6 (2.8%)                      | 53 (6.8%)         |
| Other cardiomyopathy                                   | 10 (17.5%)                           | 4 (5.3%)                   | 4 (3.6%)                                | 4 (4.0%)                      | 8 (3.6%)                                | 6 (2.8%)                      | 36 (4.6%)         |
| Unknown                                                | 3 (5.3%)                             | 3 (4.0%)                   | 5 (4.5%)                                | 2 (2.0%)                      | 1 (0.4%)                                | 2 (0.9%)                      | 16 (2.0%)         |
| <b>AF type</b>                                         |                                      |                            |                                         |                               |                                         |                               |                   |
| First episode                                          | 21 (36.8%)                           | 37 (49.3%)                 | 45 (40.9%)                              | 45 (44.6%)                    | 69 (30.8%)                              | 61 (28.0%)                    | 278 (35.4%)       |
| Paroxysmal                                             | 12 (21.1%)                           | 10 (13.3%)                 | 29 (26.4%)                              | 23 (22.8%)                    | 89 (39.7%)                              | 88 (40.4%)                    | 251 (32.0%)       |
| Persistent or long-standing persistent                 | 24 (42.1%)                           | 28 (37.3%)                 | 36 (32.7%)                              | 33 (32.7%)                    | 66 (29.5%)                              | 69 (31.7%)                    | 256 (32.6%)       |
| <b>Duration of AF history at baseline (days)</b>       |                                      |                            |                                         |                               |                                         |                               |                   |
| means and standard deviation                           | 68.4 (87.7)                          | 90.7 (158.3)               | 78.2 (105.6)                            | 84.4 (237.5)                  | 72.0 (94.1)                             | 72.8 (149.5)                  | 76.2 (142.8)      |
| Median (Q1, Q3)                                        | 34.0 (5.0, 108.0)                    | 29.0 (3.5, 131.5)          | 24.0 (7.0, 113.2)                       | 23.0 (5.0, 97.0)              | 34.0 (6.0, 102.5)                       | 25.0 (6.0, 81.2)              | 28.0 (6.0, 102.0) |
| range                                                  | 0.0 - 346.0                          | 0.0 - 1148.0               | 0.0 - 404.0                             | 0.0 - 2310.0                  | 0.0 - 639.0                             | 0.0 - 1737.0                  | 0.0 - 2310.0      |
| <b>CHA2DS2-Vasc Score</b>                              |                                      |                            |                                         |                               |                                         |                               |                   |
| means and standard deviation                           | 3.7 (1.3)                            | 3.9 (1.3)                  | 3.8 (1.3)                               | 4.1 (1.6)                     | 4.2 (1.5)                               | 4.0 (1.4)                     | 4.0 (1.4)         |
| Median (Q1, Q3)                                        | 4.0 (3.0, 5.0)                       | 4.0 (3.0, 5.0)             | 4.0 (3.0, 5.0)                          | 4.0 (3.0, 5.0)                | 4.0 (3.0, 5.0)                          | 4.0 (3.0, 5.0)                | 4.0 (3.0, 5.0)    |
| range                                                  | 2.0 - 7.0                            | 1.0 - 8.0                  | 1.0 - 7.0                               | 2.0 - 9.0                     | 2.0 - 8.0                               | 2.0 - 9.0                     | 1.0 - 9.0         |
| <b>Overall symptom score (EHRA)</b>                    |                                      |                            |                                         |                               |                                         |                               |                   |

|                                                                                     |                            |                            |                            |                            |                            |                         |                         |
|-------------------------------------------------------------------------------------|----------------------------|----------------------------|----------------------------|----------------------------|----------------------------|-------------------------|-------------------------|
| missing variables                                                                   | 3                          | 3                          | 6                          | 1                          | 26                         | 18                      | 57                      |
| EHRA I (asymptomatic)                                                               | 20<br>(37.0%)              | 21<br>(29.2%)              | 31<br>(29.8%)              | 31<br>(31.0%)              | 29<br>(14.6%)              | 34 (17.0%)              | 166 (22.8%)             |
| EHRA II                                                                             | 16<br>(29.6%)              | 41<br>(56.9%)              | 52<br>(50.0%)              | 50<br>(50.0%)              | 113<br>(57.1%)             | 118 (59.0%)             | 390 (53.6%)             |
| EHRA III                                                                            | 17<br>(31.5%)              | 10<br>(13.9%)              | 21<br>(20.2%)              | 19<br>(19.0%)              | 55<br>(27.8%)              | 45 (22.5%)              | 167 (22.9%)             |
| EHRA IV                                                                             | 1 (1.9%)                   | 0 (0.0%)                   | 0 (0.0%)                   | 0 (0.0%)                   | 1 (0.5%)                   | 3 (1.5%)                | 5 (0.7%)                |
| <b>Systolic blood pressure [mmHg]</b>                                               |                            |                            |                            |                            |                            |                         |                         |
| missing variables                                                                   | 1                          | 0                          | 0                          | 1                          | 1                          | 0                       | 3                       |
| means and standard deviation                                                        | 128.6<br>(20.8)            | 130.0<br>(18.4)            | 133.1<br>(21.4)            | 134.9<br>(18.0)            | 137.4<br>(18.1)            | 138.6 (19.4)            | 135.4 (19.4)            |
| Median (Q1, Q3)                                                                     | 130.0<br>(113.8,<br>145.0) | 130.0<br>(115.5,<br>145.0) | 130.0<br>(120.0,<br>143.5) | 135.0<br>(121.5,<br>144.2) | 137.0<br>(126.5,<br>147.0) | 136.5 (126.0,<br>150.0) | 133.5 (120.0,<br>148.0) |
| range                                                                               | 90.0 -<br>180.0            | 90.0 -<br>176.0            | 85.0 -<br>199.0            | 92.0 -<br>200.0            | 100.0 -<br>185.0           | 97.0 - 198.0            | 85.0 - 200.0            |
| <b>Diastolic blood pressure [mmHg]</b>                                              |                            |                            |                            |                            |                            |                         |                         |
| missing variables                                                                   | 1                          | 0                          | 0                          | 1                          | 1                          | 0                       | 3                       |
| means and standard deviation                                                        | 77.9 (15.9)                | 81.9 (13.0)                | 81.6 (14.0)                | 81.6 (12.2)                | 82.1 (12.4)                | 81.8 (12.4)             | 81.6 (12.9)             |
| Median (Q1, Q3)                                                                     | 80.0 (63.8,<br>90.0)       | 80.0 (75.0,<br>90.0)       | 80.0 (70.0,<br>90.0)       | 81.0 (75.0,<br>90.0)       | 80.0 (73.0,<br>90.0)       | 80.0 (70.2,<br>90.0)    | 80.0 (71.0, 90.0)       |
| range                                                                               | 45.0 -<br>113.0            | 53.0 -<br>109.0            | 50.0 -<br>120.0            | 50.0 -<br>110.0            | 51.0 -<br>115.0            | 55.0 - 120.0            | 45.0 - 120.0            |
| <b>Heart failure (NYHA classification)</b>                                          |                            |                            |                            |                            |                            |                         |                         |
| No heart failure                                                                    | 9 (15.8%)                  | 16<br>(21.3%)              | 30<br>(27.3%)              | 38<br>(37.6%)              | 0 (0.0%)                   | 0 (0.0%)                | 93 (11.8%)              |
| I                                                                                   | 9 (15.8%)                  | 15<br>(20.0%)              | 25<br>(22.7%)              | 18<br>(17.8%)              | 0 (0.0%)                   | 0 (0.0%)                | 67 (8.5%)               |
| II                                                                                  | 28<br>(49.1%)              | 31<br>(41.3%)              | 47<br>(42.7%)              | 40<br>(39.6%)              | 178<br>(79.5%)             | 183 (83.9%)             | 507 (64.6%)             |
| III                                                                                 | 11<br>(19.3%)              | 13<br>(17.3%)              | 8 (7.3%)                   | 5 (5.0%)                   | 46<br>(20.5%)              | 35 (16.1%)              | 118 (15.0%)             |
| <b>MOCA total score</b>                                                             |                            |                            |                            |                            |                            |                         |                         |
| missing variables                                                                   | 5                          | 4                          | 7                          | 3                          | 3                          | 7                       | 29                      |
| means and standard deviation                                                        | 25.9 (3.9)                 | 25.2 (3.4)                 | 24.6 (4.1)                 | 24.9 (3.9)                 | 25.3 (3.7)                 | 25.4 (4.0)              | 25.2 (3.9)              |
| Median (Q1, Q3)                                                                     | 26.0 (24.0,<br>29.0)       | 26.0 (23.0,<br>28.0)       | 26.0 (22.0,<br>28.0)       | 25.0 (23.0,<br>28.0)       | 26.0 (23.0,<br>28.0)       | 26.0 (24.0,<br>28.5)    | 26.0 (23.0, 28.0)       |
| range                                                                               | 14.0 - 30.0                | 15.0 - 30.0                | 7.0 - 30.0                 | 13.0 - 30.0                | 12.0 - 30.0                | 7.0 - 30.0              | 7.0 - 30.0              |
| <b>At least mild cognitive impairment (MoCA &lt; 26)</b>                            |                            |                            |                            |                            |                            |                         |                         |
| missing variables                                                                   | 5                          | 4                          | 7                          | 3                          | 3                          | 7                       | 29                      |
| No                                                                                  | 35<br>(67.3%)              | 36<br>(50.7%)              | 53<br>(51.5%)              | 46<br>(46.9%)              | 115<br>(52.0%)             | 117 (55.5%)             | 402 (53.2%)             |
| Yes                                                                                 | 17<br>(32.7%)              | 35<br>(49.3%)              | 50<br>(48.5%)              | 52<br>(53.1%)              | 106<br>(48.0%)             | 94 (44.5%)              | 354 (46.8%)             |
| <b>Previous pharmacological or electrical cardioversion</b>                         |                            |                            |                            |                            |                            |                         |                         |
| missing variables                                                                   | 4                          | 0                          | 3                          | 1                          | 2                          | 0                       | 10                      |
| No                                                                                  | 31<br>(58.5%)              | 42<br>(56.0%)              | 63<br>(58.9%)              | 63<br>(63.0%)              | 119<br>(53.6%)             | 124 (56.9%)             | 442 (57.0%)             |
| Yes                                                                                 | 22<br>(41.5%)              | 33<br>(44.0%)              | 44<br>(41.1%)              | 37<br>(37.0%)              | 103<br>(46.4%)             | 94 (43.1%)              | 333 (43.0%)             |
| <b>Catheter ablation</b>                                                            |                            |                            |                            |                            |                            |                         |                         |
| No Ablation                                                                         | 44<br>(77.2%)              | 63<br>(84.0%)              | 84<br>(76.4%)              | 91<br>(90.1%)              | 176<br>(78.6%)             | 189 (86.7%)             | 647 (82.4%)             |
| Ablation                                                                            | 13<br>(22.8%)              | 12<br>(16.0%)              | 26<br>(23.6%)              | 10 (9.9%)                  | 48<br>(21.4%)              | 29 (13.3%)              | 138 (17.6%)             |
| <b>Surgical treatment of AF</b>                                                     |                            |                            |                            |                            |                            |                         |                         |
| No                                                                                  | 57<br>(100.0%)             | 75<br>(100.0%)             | 110<br>(100.0%)            | 101<br>(100.0%)            | 224<br>(100.0%)            | 217 (99.5%)             | 784 (99.9%)             |
| Yes                                                                                 | 0 (0.0%)                   | 0 (0.0%)                   | 0 (0.0%)                   | 0 (0.0%)                   | 0 (0.0%)                   | 1 (0.5%)                | 1 (0.1%)                |
| <b>Prior stroke or transient ischemic attack</b>                                    |                            |                            |                            |                            |                            |                         |                         |
| No                                                                                  | 54<br>(94.7%)              | 63<br>(84.0%)              | 99<br>(90.0%)              | 85<br>(84.2%)              | 196<br>(87.5%)             | 200 (91.7%)             | 697 (88.8%)             |
| Yes                                                                                 | 3 (5.3%)                   | 12<br>(16.0%)              | 11<br>(10.0%)              | 16<br>(15.8%)              | 28<br>(12.5%)              | 18 (8.3%)               | 88 (11.2%)              |
| <b>Arterial hypertension</b>                                                        |                            |                            |                            |                            |                            |                         |                         |
| No                                                                                  | 12<br>(21.1%)              | 17<br>(22.7%)              | 13<br>(11.8%)              | 21<br>(20.8%)              | 18 (8.0%)                  | 18 (8.3%)               | 99 (12.6%)              |
| Yes                                                                                 | 45<br>(78.9%)              | 58<br>(77.3%)              | 97<br>(88.2%)              | 80<br>(79.2%)              | 206<br>(92.0%)             | 200 (91.7%)             | 686 (87.4%)             |
| <b>Severe coronary artery disease (previous myocardial infarction, CABG or PCI)</b> |                            |                            |                            |                            |                            |                         |                         |

|                                                                                    |                      |                      |                      |                      |                      |                      |                      |
|------------------------------------------------------------------------------------|----------------------|----------------------|----------------------|----------------------|----------------------|----------------------|----------------------|
| No                                                                                 | 41<br>(71.9%)        | 57<br>(76.0%)        | 84<br>(76.4%)        | 74<br>(73.3%)        | 179<br>(79.9%)       | 174 (79.8%)          | 609 (77.6%)          |
| Yes                                                                                | 16<br>(28.1%)        | 18<br>(24.0%)        | 26<br>(23.6%)        | 27<br>(26.7%)        | 45<br>(20.1%)        | 44 (20.2%)           | 176 (22.4%)          |
| <b>Stable heart failure (NYHA stage II or LVEF &lt; 50%)</b>                       |                      |                      |                      |                      |                      |                      |                      |
| No                                                                                 | 0 (0.0%)             | 0 (0.0%)             | 0 (0.0%)             | 0 (0.0%)             | 0 (0.0%)             | 0 (0.0%)             | 0 (0.0%)             |
| Yes                                                                                | 57<br>(100.0%)       | 75<br>(100.0%)       | 110<br>(100.0%)      | 101<br>(100.0%)      | 224<br>(100.0%)      | 218<br>(100.0%)      | 785 (100.0%)         |
| <b>Left ventricular hypertrophy on echocardiography (&gt; 15mm wall thickness)</b> |                      |                      |                      |                      |                      |                      |                      |
| No                                                                                 | 55<br>(96.5%)        | 71<br>(94.7%)        | 107<br>(97.3%)       | 95<br>(94.1%)        | 217<br>(96.9%)       | 214 (98.2%)          | 759 (96.7%)          |
| Yes                                                                                | 2 (3.5%)             | 4 (5.3%)             | 3 (2.7%)             | 6 (5.9%)             | 7 (3.1%)             | 4 (1.8%)             | 26 (3.3%)            |
| <b>Chronic kidney disease (MDRD stage III or IV)</b>                               |                      |                      |                      |                      |                      |                      |                      |
| No                                                                                 | 49<br>(86.0%)        | 58<br>(77.3%)        | 97<br>(88.2%)        | 82<br>(81.2%)        | 183<br>(81.7%)       | 187 (85.8%)          | 656 (83.6%)          |
| Yes                                                                                | 8 (14.0%)            | 17<br>(22.7%)        | 13<br>(11.8%)        | 19<br>(18.8%)        | 41<br>(18.3%)        | 31 (14.2%)           | 129 (16.4%)          |
| <b>Peripheral artery disease</b>                                                   |                      |                      |                      |                      |                      |                      |                      |
| No                                                                                 | 54<br>(94.7%)        | 72<br>(96.0%)        | 104<br>(94.5%)       | 96<br>(95.0%)        | 214<br>(95.5%)       | 210 (96.3%)          | 750 (95.5%)          |
| Yes                                                                                | 3 (5.3%)             | 3 (4.0%)             | 6 (5.5%)             | 5 (5.0%)             | 10 (4.5%)            | 8 (3.7%)             | 35 (4.5%)            |
| <b>History of valve replacement</b>                                                |                      |                      |                      |                      |                      |                      |                      |
| No                                                                                 | 57<br>(100.0%)       | 73<br>(97.3%)        | 110<br>(100.0%)      | 100<br>(99.0%)       | 220<br>(98.2%)       | 215 (98.6%)          | 775 (98.7%)          |
| Yes                                                                                | 0 (0.0%)             | 2 (2.7%)             | 0 (0.0%)             | 1 (1.0%)             | 4 (1.8%)             | 3 (1.4%)             | 10 (1.3%)            |
| <b>Signs of valvular disease</b>                                                   |                      |                      |                      |                      |                      |                      |                      |
| No                                                                                 | 24<br>(42.1%)        | 32<br>(42.7%)        | 55<br>(50.0%)        | 40<br>(39.6%)        | 129<br>(57.6%)       | 102 (46.8%)          | 382 (48.7%)          |
| Yes                                                                                | 33<br>(57.9%)        | 43<br>(57.3%)        | 55<br>(50.0%)        | 61<br>(60.4%)        | 95<br>(42.4%)        | 116 (53.2%)          | 403 (51.3%)          |
| <b>Heart rhythm</b>                                                                |                      |                      |                      |                      |                      |                      |                      |
| Atrial fibrillation or atrial flutter                                              | 42<br>(73.7%)        | 59<br>(78.7%)        | 68<br>(61.8%)        | 63<br>(62.4%)        | 105<br>(46.9%)       | 109 (50.0%)          | 446 (56.8%)          |
| Sinus rhythm and pacing                                                            | 15<br>(26.3%)        | 16<br>(21.3%)        | 42<br>(38.2%)        | 38<br>(37.6%)        | 119<br>(53.1%)       | 109 (50.0%)          | 339 (43.2%)          |
| <b>Heart rate in sinus rhythm</b>                                                  |                      |                      |                      |                      |                      |                      |                      |
| missing variables                                                                  | 43                   | 61                   | 69                   | 64                   | 105                  | 111                  | 453                  |
| means and standard deviation                                                       | 61.8 (12.5)          | 73.4 (24.6)          | 63.9 (13.2)          | 68.8 (10.9)          | 66.6 (12.6)          | 65.6 (11.6)          | 66.3 (13.0)          |
| Median (Q1, Q3)                                                                    | 61.5 (52.8, 70.2)    | 66.5 (59.8, 75.0)    | 63.0 (56.0, 71.0)    | 69.0 (60.0, 77.0)    | 65.0 (57.0, 75.0)    | 65.0 (59.0, 72.0)    | 65.0 (57.0, 74.0)    |
| range                                                                              | 42.0 - 83.0          | 46.0 - 134.0         | 45.0 - 112.0         | 50.0 - 97.0          | 44.0 - 100.0         | 41.0 - 108.0         | 41.0 - 134.0         |
| <b>Diastolic LA diameter (maximal diameter) [mm]</b>                               |                      |                      |                      |                      |                      |                      |                      |
| missing variables                                                                  | 6                    | 7                    | 15                   | 14                   | 51                   | 60                   | 153                  |
| means and standard deviation                                                       | 49.2 (8.7)           | 49.5 (11.1)          | 44.2 (7.8)           | 45.2 (7.5)           | 45.0 (7.5)           | 44.8 (8.5)           | 45.7 (8.5)           |
| Median (Q1, Q3)                                                                    | 48.0 (43.5, 54.5)    | 48.0 (41.0, 54.8)    | 44.0 (40.0, 49.0)    | 45.0 (40.0, 49.5)    | 44.0 (40.0, 48.0)    | 43.0 (40.0, 48.0)    | 44.0 (40.0, 50.0)    |
| range                                                                              | 34.0 - 70.0          | 32.0 - 85.0          | 26.0 - 73.0          | 28.0 - 65.0          | 28.0 - 74.0          | 31.0 - 82.0          | 26.0 - 85.0          |
| <b>Hb value [g/l]</b>                                                              |                      |                      |                      |                      |                      |                      |                      |
| missing variables                                                                  | 0                    | 1                    | 1                    | 2                    | 0                    | 1                    | 5                    |
| means and standard deviation                                                       | 143.9 (15.6)         | 145.6 (14.1)         | 141.6 (16.2)         | 144.4 (15.5)         | 138.6 (15.1)         | 141.0 (14.6)         | 141.5 (15.2)         |
| Median (Q1, Q3)                                                                    | 146.0 (136.0, 154.0) | 147.5 (137.2, 155.5) | 143.0 (133.0, 154.0) | 147.0 (134.0, 154.6) | 139.0 (128.9, 148.1) | 141.0 (130.0, 152.0) | 142.0 (131.0, 152.0) |
| range                                                                              | 109.0 - 180.0        | 112.0 - 175.0        | 82.0 - 184.0         | 100.0 - 177.0        | 93.0 - 174.0         | 97.0 - 174.0         | 82.0 - 184.0         |
| <b>GFR (MDRD formula)</b>                                                          |                      |                      |                      |                      |                      |                      |                      |
| missing variables                                                                  | 0                    | 1                    | 2                    | 1                    | 2                    | 2                    | 8                    |
| means and standard deviation                                                       | 73.5 (15.7)          | 69.8 (23.4)          | 77.1 (19.0)          | 75.5 (21.8)          | 73.7 (22.5)          | 74.0 (19.9)          | 74.1 (20.9)          |
| Median (Q1, Q3)                                                                    | 75.7 (63.0, 83.4)    | 70.5 (54.5, 82.8)    | 76.2 (65.5, 88.2)    | 74.7 (63.1, 91.3)    | 71.6 (59.1, 87.4)    | 73.6 (60.8, 86.4)    | 73.7 (60.5, 87.1)    |
| range                                                                              | 41.0 - 117.6         | 23.6 - 144.8         | 32.9 - 166.3         | 32.6 - 156.0         | 22.8 - 153.9         | 21.7 - 134.7         | 21.7 - 166.3         |
| <b>Chronic obstructive lung disease</b>                                            |                      |                      |                      |                      |                      |                      |                      |
| missing variables                                                                  | 0                    | 0                    | 0                    | 0                    | 1                    | 3                    | 4                    |
| No                                                                                 | 53<br>(93.0%)        | 68<br>(90.7%)        | 99<br>(90.0%)        | 88<br>(87.1%)        | 198<br>(88.8%)       | 184 (85.6%)          | 690 (88.3%)          |
| Yes                                                                                | 4 (7.0%)             | 7 (9.3%)             | 11<br>(10.0%)        | 13<br>(12.9%)        | 25<br>(11.2%)        | 31 (14.4%)           | 91 (11.7%)           |

|                                                                             |                   |                   |                   |                   |                   |                   |                   |
|-----------------------------------------------------------------------------|-------------------|-------------------|-------------------|-------------------|-------------------|-------------------|-------------------|
| <b>Malignant diseases</b>                                                   |                   |                   |                   |                   |                   |                   |                   |
| missing variables                                                           | 2                 | 0                 | 0                 | 0                 | 0                 | 0                 | 2                 |
| No                                                                          | 51<br>(92.7%)     | 73<br>(97.3%)     | 102<br>(92.7%)    | 95<br>(94.1%)     | 209<br>(93.3%)    | 204 (93.6%)       | 734 (93.7%)       |
| Yes, currently under therapy or with currently active disease manifestation | 0 (0.0%)          | 0 (0.0%)          | 0 (0.0%)          | 1 (1.0%)          | 0 (0.0%)          | 2 (0.9%)          | 3 (0.4%)          |
| Yes, not under current therapy and without active disease manifestation     | 4 (7.3%)          | 2 (2.7%)          | 8 (7.3%)          | 5 (5.0%)          | 15 (6.7%)         | 12 (5.5%)         | 46 (5.9%)         |
| <b>Thyroid dysfunction (hypothyroidism or hyperthyroidism)</b>              |                   |                   |                   |                   |                   |                   |                   |
| No                                                                          | 51<br>(89.5%)     | 72<br>(96.0%)     | 100<br>(90.9%)    | 96<br>(95.0%)     | 200<br>(89.3%)    | 202 (92.7%)       | 721 (91.8%)       |
| Yes                                                                         | 6 (10.5%)         | 3 (4.0%)          | 10 (9.1%)         | 5 (5.0%)          | 24<br>(10.7%)     | 16 (7.3%)         | 64 (8.2%)         |
| <b>Diabetes mellitus</b>                                                    |                   |                   |                   |                   |                   |                   |                   |
| No                                                                          | 38<br>(66.7%)     | 53<br>(70.7%)     | 80<br>(72.7%)     | 71<br>(70.3%)     | 160<br>(71.4%)    | 169 (77.5%)       | 571 (72.7%)       |
| Yes                                                                         | 19<br>(33.3%)     | 22<br>(29.3%)     | 30<br>(27.3%)     | 30<br>(29.7%)     | 64<br>(28.6%)     | 49 (22.5%)        | 214 (27.3%)       |
| <b>Heart rate [beats/minute]</b>                                            |                   |                   |                   |                   |                   |                   |                   |
| missing variables                                                           | 42                | 59                | 67                | 61                | 103               | 107               | 439               |
| means and standard deviation                                                | 62.3 (12.2)       | 72.3 (23.2)       | 65.8 (18.1)       | 67.5 (11.7)       | 66.7 (12.8)       | 66.0 (11.9)       | 66.5 (13.7)       |
| Median (Q1, Q3)                                                             | 63.0 (53.5, 70.5) | 66.5 (59.8, 75.0) | 63.0 (56.0, 71.5) | 67.5 (59.5, 77.0) | 65.0 (57.0, 75.0) | 65.0 (59.0, 72.0) | 65.0 (57.0, 74.0) |
| range                                                                       | 42.0 - 83.0       | 46.0 - 134.0      | 45.0 - 147.0      | 42.0 - 97.0       | 44.0 - 100.0      | 41.0 - 108.0      | 41.0 - 147.0      |
| <b>Digoxin or Digitoxin at discharge</b>                                    |                   |                   |                   |                   |                   |                   |                   |
| No                                                                          | 55<br>(96.5%)     | 65<br>(86.7%)     | 102<br>(92.7%)    | 87<br>(86.1%)     | 212<br>(94.6%)    | 204 (93.6%)       | 725 (92.4%)       |
| Yes                                                                         | 2 (3.5%)          | 10<br>(13.3%)     | 8 (7.3%)          | 14<br>(13.9%)     | 12 (5.4%)         | 14 (6.4%)         | 60 (7.6%)         |
| <b>Beta Blockers at discharge</b>                                           |                   |                   |                   |                   |                   |                   |                   |
| No                                                                          | 6 (10.5%)         | 7 (9.3%)          | 22<br>(20.0%)     | 9 (8.9%)          | 33<br>(14.7%)     | 26 (11.9%)        | 103 (13.1%)       |
| Yes                                                                         | 51<br>(89.5%)     | 68<br>(90.7%)     | 88<br>(80.0%)     | 92<br>(91.1%)     | 191<br>(85.3%)    | 192 (88.1%)       | 682 (86.9%)       |
| <b>Ca channel antagonists at discharge</b>                                  |                   |                   |                   |                   |                   |                   |                   |
| No                                                                          | 43<br>(75.4%)     | 60<br>(80.0%)     | 74<br>(67.3%)     | 77<br>(76.2%)     | 153<br>(68.3%)    | 141 (64.7%)       | 548 (69.8%)       |
| Yes                                                                         | 14<br>(24.6%)     | 15<br>(20.0%)     | 36<br>(32.7%)     | 24<br>(23.8%)     | 71<br>(31.7%)     | 77 (35.3%)        | 237 (30.2%)       |
| <b>ACE inhibitors or Angiotensin II receptor blocker at discharge</b>       |                   |                   |                   |                   |                   |                   |                   |
| No                                                                          | 9 (15.8%)         | 11<br>(14.7%)     | 27<br>(24.5%)     | 29<br>(28.7%)     | 63<br>(28.1%)     | 53 (24.3%)        | 192 (24.5%)       |
| Yes                                                                         | 48<br>(84.2%)     | 64<br>(85.3%)     | 83<br>(75.5%)     | 72<br>(71.3%)     | 161<br>(71.9%)    | 165 (75.7%)       | 593 (75.5%)       |
| <b>Oral anticoagulation (NOAC &amp; VKA) at discharge</b>                   |                   |                   |                   |                   |                   |                   |                   |
| No                                                                          | 2 (3.5%)          | 5 (6.7%)          | 9 (8.2%)          | 8 (7.9%)          | 18 (8.0%)         | 30 (13.8%)        | 72 (9.2%)         |
| Yes                                                                         | 55<br>(96.5%)     | 70<br>(93.3%)     | 101<br>(91.8%)    | 93<br>(92.1%)     | 206<br>(92.0%)    | 188 (86.2%)       | 713 (90.8%)       |
| <b>Mineralocorticoid receptor antagonist at discharge</b>                   |                   |                   |                   |                   |                   |                   |                   |
| No                                                                          | 36<br>(63.2%)     | 55<br>(73.3%)     | 96<br>(87.3%)     | 92<br>(91.1%)     | 205<br>(91.5%)    | 202 (92.7%)       | 686 (87.4%)       |
| Yes                                                                         | 21<br>(36.8%)     | 20<br>(26.7%)     | 14<br>(12.7%)     | 9 (8.9%)          | 19 (8.5%)         | 16 (7.3%)         | 99 (12.6%)        |
| <b>Insulin at discharge</b>                                                 |                   |                   |                   |                   |                   |                   |                   |
| No                                                                          | 52<br>(91.2%)     | 68<br>(90.7%)     | 106<br>(96.4%)    | 95<br>(94.1%)     | 213<br>(95.1%)    | 208 (95.4%)       | 742 (94.5%)       |
| Yes                                                                         | 5 (8.8%)          | 7 (9.3%)          | 4 (3.6%)          | 6 (5.9%)          | 11 (4.9%)         | 10 (4.6%)         | 43 (5.5%)         |
| <b>Oral antidiabetics at discharge</b>                                      |                   |                   |                   |                   |                   |                   |                   |
| No                                                                          | 47<br>(82.5%)     | 59<br>(78.7%)     | 92<br>(83.6%)     | 81<br>(80.2%)     | 185<br>(82.6%)    | 191 (87.6%)       | 655 (83.4%)       |
| Yes                                                                         | 10<br>(17.5%)     | 16<br>(21.3%)     | 18<br>(16.4%)     | 20<br>(19.8%)     | 39<br>(17.4%)     | 27 (12.4%)        | 130 (16.6%)       |
| <b>Diuretics at discharge</b>                                               |                   |                   |                   |                   |                   |                   |                   |
| No                                                                          | 20<br>(35.1%)     | 31<br>(41.3%)     | 56<br>(50.9%)     | 55<br>(54.5%)     | 120<br>(53.6%)    | 107 (49.1%)       | 389 (49.6%)       |
| Yes                                                                         | 37<br>(64.9%)     | 44<br>(58.7%)     | 54<br>(49.1%)     | 46<br>(45.5%)     | 104<br>(46.4%)    | 111 (50.9%)       | 396 (50.4%)       |
| <b>Antianginal drugs at discharge</b>                                       |                   |                   |                   |                   |                   |                   |                   |
| No                                                                          | 56<br>(98.2%)     | 75<br>(100.0%)    | 109<br>(99.1%)    | 98<br>(97.0%)     | 221<br>(98.7%)    | 217 (99.5%)       | 776 (98.9%)       |
| Yes                                                                         | 1 (1.8%)          | 0 (0.0%)          | 1 (0.9%)          | 3 (3.0%)          | 3 (1.3%)          | 1 (0.5%)          | 9 (1.1%)          |

|                                                       |               |               |               |               |                |             |             |
|-------------------------------------------------------|---------------|---------------|---------------|---------------|----------------|-------------|-------------|
| <b>Statin at discharge</b>                            |               |               |               |               |                |             |             |
| No                                                    | 34<br>(59.6%) | 39<br>(52.0%) | 55<br>(50.0%) | 59<br>(58.4%) | 112<br>(50.0%) | 126 (57.8%) | 425 (54.1%) |
| Yes                                                   | 23<br>(40.4%) | 36<br>(48.0%) | 55<br>(50.0%) | 42<br>(41.6%) | 112<br>(50.0%) | 92 (42.2%)  | 360 (45.9%) |
| <b>Inhibitor of platelet aggregation at discharge</b> |               |               |               |               |                |             |             |
| No                                                    | 42<br>(73.7%) | 62<br>(82.7%) | 87<br>(79.1%) | 76<br>(75.2%) | 190<br>(84.8%) | 189 (86.7%) | 646 (82.3%) |
| Yes                                                   | 15<br>(26.3%) | 13<br>(17.3%) | 23<br>(20.9%) | 25<br>(24.8%) | 34<br>(15.2%)  | 29 (13.3%)  | 139 (17.7%) |

LVEF Left ventricular ejection fraction; AF atrial fibrillation; LA left atrium; CABG Coronary artery bypass graft; PCI Percutaneous coronary intervention; CHA<sub>2</sub>DS<sub>2</sub>-Vasc score conducted with Congestive Heart failure; EHRA score European Heart Rhythm Association score for assessment of atrial fibrillation symptoms; NYHA class New York Heart Association classification of symptoms in heart failure patients. EQ-5D score European Quality of Life 5 Dimensions score; SF-12 Short Form Health survey 12-items; MoCA score Montreal Cognitive Assessment Score. NOAC Novel oral anticoagulants; VKA Vitamin K antagonists. MDRD Modification of Diet in Renal Disease.

EAST-AFNET4 indicates Early Treatment for Atrial Fibrillation for Stroke Prevention Trial.

**Supplemental Table II.** EAST-AFNET4 heart failure patients with and without ischemic cardiomyopathy (ICM) by randomized groups. There was no interaction between etiology of heart failure and the randomized intervention.

| Outcome                                              | Subgroup | Early rhythm control | Usual care    | Treatment effect      | p-value | p-value interaction (between treatment and ischemic cardiomyopathy indicator) |
|------------------------------------------------------|----------|----------------------|---------------|-----------------------|---------|-------------------------------------------------------------------------------|
| First primary outcome                                | ICM No   | 62/319 (19.4)        | 86/322 (26.7) | 0.73 (0.52 to 1.02)   | 0.06    | 0.89                                                                          |
|                                                      | ICM Yes  | 32/1330 (2.4)        | 44/1328 (3.3) | 0.76 (0.48 to 1.21)   | 0.24    |                                                                               |
| Second primary outcome - nights spent in hospital/yr | ICM No   | 8.26±30.71           | 7.37±25.82    | 1.28 (0.98 to 1.68)   | 0.08    | 0.99                                                                          |
|                                                      | ICM Yes  | 8.71±14.13           | 7.78±15.73    | 1.27 (0.77 to 2.09)   | 0.35    |                                                                               |
| Change in left ventricular ejection fraction         | ICM No   | 6.06±12.07           | 4.79±11.53    | 1.08 (-0.50 to 2.66)  | 0.18    | 0.43                                                                          |
|                                                      | ICM Yes  | 3.75±9.76            | 2.91±11.36    | -0.33 (-3.42 to 2.77) | 0.84    |                                                                               |

**EAST-AFNET4 indicates Early Treatment for Atrial Fibrillation for Stroke Prevention Trial.**

**Supplemental Table III.** Outcomes of EAST-AFNET4 heart failure patients according to a “CABANA-like” composite endpoint including death, disabling stroke, serious bleeding, or cardiac arrest by randomized groups.

|                                                   | Early rhythm control | Usual care    | Treatment effect    | p-value | Interaction p-value between treatment group and HF |
|---------------------------------------------------|----------------------|---------------|---------------------|---------|----------------------------------------------------|
| CABANA events/person-yr (incidence/100 person-yr) | 51/1831 (2.8)        | 71/1894 (3.7) | 0.74 (0.51 to 1.06) | 0.10    | 0.32                                               |

EAST-AFNET4 indicates Early Treatment for Atrial Fibrillation for Stroke Prevention Trial. CABANA indicates Catheter Ablation Versus Antiarrhythmic Drug Therapy for Atrial Fibrillation.



**Supplemental Table IV.** Background therapy of EAST-AFNET4 heart failure patients by randomized groups at discharge from baseline visit: initial rhythm control therapy

|                               | Early rhythm control (N=396) | Usual care (N=402) | Total (N=798) |
|-------------------------------|------------------------------|--------------------|---------------|
| <b>Initial rhythm control</b> |                              |                    |               |
| None                          | 27 (6.8%)                    | 379 (94.3%)        | 406 (50.9%)   |
| Other antiarrhythmic drug     | 21 (5.3%)                    | 1 (0.2%)           | 22 (2.8%)     |
| Propafenone                   | 21 (5.3%)                    | 0 (0.0%)           | 21 (2.6%)     |
| Flecainide                    | 133 (33.6%)                  | 6 (1.5%)           | 139 (17.4%)   |
| Amiodarone                    | 123 (31.1%)                  | 15 (3.7%)          | 138 (17.3%)   |
| Dronedarone                   | 40 (10.1%)                   | 1 (0.2%)           | 41 (5.1%)     |
| AF ablation                   | 31 (7.8%)                    | 0 (0.0%)           | 31 (3.9%)     |

AF Atrial fibrillation.

**Supplemental Table V. Clinical characteristics of EAST-AFNET4 heart failure patients with and without catheter ablation.**

|                                                        | <b>Ablation<br/>(N=140)</b> | <b>No Ablation<br/>(N=658)</b> | <b>Total (N=798)</b> |
|--------------------------------------------------------|-----------------------------|--------------------------------|----------------------|
| <b>Randomgroup</b>                                     |                             |                                |                      |
| Usual care                                             | 52 (37.1%)                  | 350 (53.2%)                    | 402 (50.4%)          |
| Early rhythm control                                   | 88 (62.9%)                  | 308 (46.8%)                    | 396 (49.6%)          |
| <b>LVEF at baseline categories</b>                     |                             |                                |                      |
| missing variables                                      | 2                           | 11                             | 13                   |
| reduced                                                | 25 (18.1%)                  | 107 (16.5%)                    | 132 (16.8%)          |
| mid-range                                              | 36(26.1%)                   | 175 (27.0%)                    | 211 (26.9%)          |
| preserved                                              | 77 (55.8%)                  | 365 (56.4%)                    | 442 (56.3%)          |
| <b>Gender</b>                                          |                             |                                |                      |
| Male                                                   | 84 (60.0%)                  | 414 (62.9%)                    | 498 (62.4%)          |
| Female                                                 | 56 (40.0%)                  | 244 (37.1%)                    | 300 (37.6%)          |
| <b>Age</b>                                             |                             |                                |                      |
| means and standard deviation                           | 66.5 (7.9)                  | 70.7 (9.3)                     | 69.9 (9.2)           |
| Median (Q1, Q3)                                        | 68.0 (61.0, 72.2)           | 72.0 (65.0, 77.0)              | 71.0 (64.0, 76.0)    |
| range                                                  | 49.0 - 81.0                 | 34.0 - 91.0                    | 34.0 - 91.0          |
| <b>Body Mass Index (calculated) [kg/m<sup>2</sup>]</b> |                             |                                |                      |
| missing variables                                      | 0                           | 3                              | 3                    |
| means and standard deviation                           | 29.9 (5.3)                  | 30.0 (6.0)                     | 30.0 (5.9)           |
| Median (Q1, Q3)                                        | 29.6 (26.1, 32.8)           | 29.3 (26.2, 33.3)              | 29.4 (26.2, 33.2)    |
| range                                                  | 19.9 - 46.6                 | 16.6 - 58.2                    | 16.6 - 58.2          |
| <b>LVEF at baseline</b>                                |                             |                                |                      |
| missing variables                                      | 2                           | 11                             | 13                   |
| means and standard deviation                           | 50.7 (13.0)                 | 51.5 (12.7)                    | 51.4 (12.7)          |
| Median (Q1, Q3)                                        | 50.0 (41.5, 60.0)           | 53.0 (43.0, 62.0)              | 52.0 (43.0, 62.0)    |
| range                                                  | 20.0 - 79.0                 | 13.0 - 85.0                    | 13.0 - 85.0          |
| <b>Cardiomyopathy</b>                                  |                             |                                |                      |
| missing variables                                      | 0                           | 2                              | 2                    |
| No                                                     | 110 (78.6%)                 | 537 (81.9%)                    | 647 (81.3%)          |
| Tachycardiomyopathy                                    | 10 (7.1%)                   | 27 (4.1%)                      | 37 (4.6%)            |
| Hypertrophic cardiomyopathy                            | 1 (0.7%)                    | 6 (0.9%)                       | 7 (0.9%)             |
| Dilatative cardiomyopathy                              | 9 (6.4%)                    | 44 (6.7%)                      | 53 (6.7%)            |
| Other cardiomyopathy                                   | 7 (5.0%)                    | 29 (4.4%)                      | 36 (4.5%)            |
| Unknown                                                | 3 (2.1%)                    | 13 (2.0%)                      | 16 (2.0%)            |
| <b>Atrial fibrillation type</b>                        |                             |                                |                      |
| missing variables                                      | 0                           | 2                              | 2                    |
| First episode                                          | 40 (28.6%)                  | 242 (36.9%)                    | 282 (35.4%)          |
| Paroxysmal                                             | 27 (19.3%)                  | 225 (34.3%)                    | 252 (31.7%)          |
| Persistent or long-standing persistent                 | 73 (52.1%)                  | 189 (28.8%)                    | 262 (32.9%)          |
| <b>Duration of AF history at baseline (days)</b>       |                             |                                |                      |
| missing variables                                      | 0                           | 1                              | 1                    |
| means and standard deviation                           | 99.4 (174.1)                | 71.6 (134.4)                   | 76.5 (142.5)         |
| Median (Q1, Q3)                                        | 36.0 (6.0, 139.5)           | 25.0 (5.0, 93.0)               | 27.0 (5.0, 102.0)    |
| range                                                  | 0.0 - 1737.0                | 0.0 - 2310.0                   | 0.0 - 2310.0         |
| <b>CHA2DS2-Vasc Score</b>                              |                             |                                |                      |
| means and standard deviation                           | 3.7 (1.3)                   | 4.1 (1.4)                      | 4.0 (1.4)            |
| Median (Q1, Q3)                                        | 3.0 (3.0, 5.0)              | 4.0 (3.0, 5.0)                 | 4.0 (3.0, 5.0)       |

|                                                                                     |                   |                   |                   |
|-------------------------------------------------------------------------------------|-------------------|-------------------|-------------------|
| range                                                                               | 2.0 - 8.0         | 1.0 - 9.0         | 1.0 - 9.0         |
| <b>Overall symptom score (EHRA)</b>                                                 |                   |                   |                   |
| missing variables                                                                   | 9                 | 51                | 60                |
| EHRA I (asymptomatic)                                                               | 29 (22.1%)        | 140 (23.1%)       | 169 (22.9%)       |
| EHRA II                                                                             | 62 (47.3%)        | 334 (55.0%)       | 396 (53.7%)       |
| EHRA III                                                                            | 40 (30.5%)        | 128 (21.1%)       | 168 (22.8%)       |
| EHRA IV                                                                             | 0 (0.0%)          | 5 (0.8%)          | 5 (0.7%)          |
| <b>Heart failure (NYHA classification)</b>                                          |                   |                   |                   |
| missing variables                                                                   | 0                 | 2                 | 2                 |
| No heart failure                                                                    | 17 (12.1%)        | 77 (11.7%)        | 94 (11.8%)        |
| I                                                                                   | 10 (7.1%)         | 58 (8.8%)         | 68 (8.5%)         |
| II                                                                                  | 91 (65.0%)        | 423 (64.5%)       | 514 (64.6%)       |
| III                                                                                 | 22 (15.7%)        | 98 (14.9%)        | 120 (15.1%)       |
| <b>Prior stroke or transient ischemic attack</b>                                    |                   |                   |                   |
| No                                                                                  | 125 (89.3%)       | 584 (88.8%)       | 709 (88.8%)       |
| Yes                                                                                 | 15 (10.7%)        | 74 (11.2%)        | 89 (11.2%)        |
| <b>Arterial hypertension</b>                                                        |                   |                   |                   |
| No                                                                                  | 13 (9.3%)         | 89 (13.5%)        | 102 (12.8%)       |
| Yes                                                                                 | 127 (90.7%)       | 569 (86.5%)       | 696 (87.2%)       |
| <b>Severe coronary artery disease (previous myocardial infarction, CABG or PCI)</b> |                   |                   |                   |
| No                                                                                  | 112 (80.0%)       | 507 (77.1%)       | 619 (77.6%)       |
| Yes                                                                                 | 28 (20.0%)        | 151 (22.9%)       | 179 (22.4%)       |
| <b>Diastolic Left atrial diameter (maximal diameter) [mm]</b>                       |                   |                   |                   |
| missing variables                                                                   | 25                | 138               | 163               |
| means and standard deviation                                                        | 46.9 (8.1)        | 45.4 (8.6)        | 45.7 (8.5)        |
| Median (Q1, Q3)                                                                     | 46.0 (40.0, 51.5) | 44.0 (40.0, 49.0) | 44.0 (40.0, 50.0) |
| range                                                                               | 32.0 - 73.0       | 26.0 - 85.0       | 26.0 - 85.0       |
| <b>Diabetes</b>                                                                     |                   |                   |                   |
| missing variables                                                                   | 0                 | 2                 | 2                 |
| No diabetes or imp. glucose tolerance                                               | 104 (74.3%)       | 477 (72.7%)       | 581 (73.0%)       |
| Yes (managed by diet, oral antidiabetics, and/or insulin or no therapy)             | 36 (25.7%)        | 179 (27.3%)       | 215 (27.0%)       |

LVEF Left ventricular ejection fraction. CABG Coronary artery bypass graft; PCI Percutaneous coronary intervention; CHA2DS2-Vasc score conducted with Congestive Heart failure; EHRA score European Heart Rhythm Association score for assessment of atrial fibrillation symptoms; NYHA class New York Heart Association classification of symptoms in heart failure patients. EAST-AFNET4 indicates Early Treatment for Atrial Fibrillation for Stroke Prevention Trial.

**Supplement Table VI. Further safety outcomes of EAST-AFNET4 heart failure patients by randomized groups.**

| Safety outcome type                                                                       | Early rhythm control<br>(N=396) | Usual care<br>(N=402) | Total<br>(N=798) |
|-------------------------------------------------------------------------------------------|---------------------------------|-----------------------|------------------|
| 1 - TIA                                                                                   | 6 (0.6%)                        | 5 (0.4%)              | 11 (0.5%)        |
| 2 - Ischemic stroke (including transient events with matching lesion on cerebral imaging) | 7 (0.7%)                        | 14 (1.2%)             | 21 (1.0%)        |
| 3 - Haemorrhagic stroke                                                                   | 1 (0.1%)                        | 4 (0.4%)              | 5 (0.2%)         |
| 6 - STEMI, anterior                                                                       | 1 (0.1%)                        | 1 (0.1%)              | 2 (0.1%)         |
| 7 - STEMI, posterior                                                                      | 3 (0.3%)                        | 0 (0.0%)              | 3 (0.1%)         |
| 9 - NSTEMI                                                                                | 8 (0.8%)                        | 15 (1.3%)             | 23 (1.0%)        |
| 10 - Unstable AP                                                                          | 5 (0.5%)                        | 5 (0.4%)              | 10 (0.5%)        |
| 11 - Stable AP or atypical chest pain                                                     | 21 (2.0%)                       | 19 (1.7%)             | 40 (1.8%)        |
| 12 - Worsening of heart failure, decompensated                                            | 118 (11.1%)                     | 153 (13.6%)           | 271 (12.4%)      |
| 13 - Worsening of heart failure, not decompensated                                        | 5 (0.5%)                        | 9 (0.8%)              | 14 (0.6%)        |
| 14 - Torsade de Pointes tachycardia                                                       | 1 (0.1%)                        | 0 (0.0%)              | 1 (0.0%)         |
| 15 - Ventricular tachycardia                                                              | 3 (0.3%)                        | 2 (0.2%)              | 5 (0.2%)         |
| 16 - Ventricular fibrillation                                                             | 3 (0.3%)                        | 2 (0.2%)              | 5 (0.2%)         |
| 17 - Drug-induced bradycardia                                                             | 12 (1.1%)                       | 9 (0.8%)              | 21 (1.0%)        |
| 18 - AV nodal block                                                                       | 1 (0.1%)                        | 1 (0.1%)              | 2 (0.1%)         |
| 19 - Ablation-induced or drug-induced atrial flutter / atrial tachycardia                 | 5 (0.5%)                        | 0 (0.0%)              | 5 (0.2%)         |
| 20 - Syncope                                                                              | 11 (1.0%)                       | 20 (1.8%)             | 31 (1.4%)        |
| 21 - Bleeding caused by catheter intervention or antithrombotic therapy                   | 12 (1.1%)                       | 24 (2.1%)             | 36 (1.6%)        |
| 23 - Pericardial tamponade                                                                | 1 (0.1%)                        | 1 (0.1%)              | 2 (0.1%)         |
| 25 - Drug toxicity of AF-related drug therapy                                             | 6 (0.6%)                        | 2 (0.2%)              | 8 (0.4%)         |
| 26 - Non-fatal cardiac arrest                                                             | 4 (0.4%)                        | 2 (0.2%)              | 6 (0.3%)         |
| 28 - Any type of cardiovascular surgery                                                   | 22 (2.1%)                       | 18 (1.6%)             | 40 (1.8%)        |
| 29 - Implantation of a pacemaker, ICD, CRT or any other cardiac device                    | 39 (3.7%)                       | 40 (3.5%)             | 79 (3.6%)        |
| 30 - Percutaneous coronary (e.g. PCI), cerebrovascular or peripheral procedure            | 23 (2.2%)                       | 40 (3.5%)             | 63 (2.9%)        |
| 31 - Blood pressure related (hypotension, hypertension; except syncope)                   | 16 (1.5%)                       | 23 (2.0%)             | 39 (1.8%)        |
| 32 - Cardiovascular infection (e.g. endocarditis, pericarditis, infectious myocarditis)   | 3 (0.3%)                        | 2 (0.2%)              | 5 (0.2%)         |
| 33 - Major bleeding                                                                       | 32 (3.0%)                       | 43 (3.8%)             | 75 (3.4%)        |
| 34 - Pulmonary embolism or deep vein thrombosis                                           | 7 (0.7%)                        | 2 (0.2%)              | 9 (0.4%)         |
| 35 - Hospitalisation for AF                                                               | 166 (15.6%)                     | 144 (12.8%)           | 310 (14.1%)      |
| 36 - Other cardiovascular event                                                           | 35 (3.3%)                       | 39 (3.5%)             | 74 (3.4%)        |
| 37 - Other event                                                                          | 468 (44.0%)                     | 456 (40.4%)           | 924 (42.1%)      |
| 38 - Death as primary event (sudden death)                                                | 19 (1.8%)                       | 34 (3.0%)             | 53 (2.4%)        |

TIA transient ischemic attack; STEMI ST-elevation myocardial infarction; NSTEMI Non-ST-elevation myocardial infarction; AP angina pectoris; AV-nodal block Atrio-ventricular nodal block; AF atrial fibrillation; ICD implantable cardioverter and defibrillator; CRT cardiac resynchronization therapy; PCI percutaneous coronary intervention.

**Supplemental Table VII.** Change in left ventricular ejection fraction at 24 months in EAST-AFNET4 heart failure patients by randomized groups.

| <b>Outcome</b>                                  | <b>Early rhythm control</b> | <b>Usual care</b> | <b>Effect</b>       | <b>p-value</b> |
|-------------------------------------------------|-----------------------------|-------------------|---------------------|----------------|
| LVEF change from reduced to mid-range/preserved | 24/384 (6.25)               | 26/378 (6.88)     | 0.84 (0.48 to 1.48) | 0.55           |
| LVEF change from reduced to preserved           | 24/378 (6.35)               | 29/366 (7.92)     | 0.73 (0.41 to 1.30) | 0.29           |

LVEF Left ventricular ejection fraction

**Supplemental Table VIII.** Sensitivity analysis for first primary outcome by left ventricular function subgroup using only complete cases (n=785).

| Outcome                                                                       | Subgroup LVEF | Early rhythm control | Usual care    | Treatment effect    | p-value |
|-------------------------------------------------------------------------------|---------------|----------------------|---------------|---------------------|---------|
| First primary outcome events<br>events/person-yr<br>(incidence/100 person-yr) | reduced       | 21/229 (9.2)         | 35/258 (13.6) | 0.64 (0.36 to 1.12) | 0.12    |
|                                                                               | mid-range     | 23/476 (4.8)         | 28/419 (6.7)  | 0.77 (0.44 to 1.34) | 0.35    |
|                                                                               | preserved     | 50/934 (5.4)         | 63/939 (6.7)  | 0.81 (0.56 to 1.18) | 0.28    |

LVEF Left ventricular ejection fraction.

**Supplemental Table IX.** Change in EHRA score of EAST-AFNET4 heart failure patients by randomized groups.

|                                           | <b>Early rhythm control - FU 24 months</b> | <b>Usual Care - FU 24 months</b> |
|-------------------------------------------|--------------------------------------------|----------------------------------|
| EHRA Improved                             | 164/291 (56.4)                             | 169/312 (54.2)                   |
| EHRA Unchanged                            | 100/291 (34.4)                             | 114/312 (36.5)                   |
| EHRA Worsened                             | 27/291 (9.3)                               | 29/312 (9.3)                     |
| p-value mixed ordered logistic regression |                                            | 0.38                             |

**Supplemental Table X.** Change in EHRA score of EAST-AFNET4 heart failure patients as per LVEF subgroup.

| <b>LVEF category</b> | <b>EHRA change 24 months</b> | <b>Early rhythm control</b> | <b>Usual care</b> |
|----------------------|------------------------------|-----------------------------|-------------------|
| reduced              | Improved                     | 19/43 (44.19)               | 29/52 (55.77)     |
|                      | Unchanged                    | 16/43 (37.21)               | 18/52 (34.62)     |
|                      | Worsened                     | 8/43 (18.60)                | 5/52 (9.62)       |
| mid-range            | Improved                     | 52/90 (57.78)               | 47/80 (58.75)     |
|                      | Unchanged                    | 31/90 (34.44)               | 24/80 (30.00)     |
|                      | Worsened                     | 7/90 (7.78)                 | 9/80 (11.25)      |
| preserved            | Improved                     | 92/156 (58.97)              | 90/175 (51.43)    |
|                      | Unchanged                    | 53/156 (33.97)              | 71/175 (40.57)    |
|                      | Worsened                     | 11/156 (7.05)               | 14/175 (8.00)     |

LVEF Left ventricular ejection fraction. EHRA score European Heart Rhythm Association score for assessment of atrial fibrillation symptoms; EAST-AFNET4 indicates Early Treatment for Atrial Fibrillation for Stroke Prevention Trial.



**Supplemental Table XI.** Background therapy of EAST-AFNET4 heart failure patients by randomized groups at discharge from baseline visit: anticoagulation therapy.

|                      | Early rhythm control (N=396) | Usual care (N=402) | Total (N=798) |
|----------------------|------------------------------|--------------------|---------------|
| Baseline             |                              |                    |               |
| Neither of both      | 29 (7.4%)                    | 43 (10.7%)         | 72 (9.0%)     |
| Combination of both  | 0 (0.0%)                     | 2 (0.5%)           | 2 (0.3%)      |
| Vitamin K Antagonist | 122 (31.0%)                  | 126 (31.3%)        | 248 (31.2%)   |
| NOAC                 | 243 (61.7%)                  | 231 (57.5%)        | 474 (59.5%)   |
| 12 months            |                              |                    |               |
| Neither of both      | 39 (11.4%)                   | 37 (10.6%)         | 76 (11.0%)    |
| Combination of both  | 0 (0.0%)                     | 1 (0.3%)           | 1 (0.1%)      |
| Vitamin K Antagonist | 97 (28.4%)                   | 109 (31.3%)        | 206 (29.9%)   |
| NOAC                 | 206 (60.2%)                  | 201 (57.8%)        | 407 (59.0%)   |
| 24 months            |                              |                    |               |
| Neither of both      | 36 (11.1%)                   | 38 (11.5%)         | 74 (11.3%)    |
| Combination of both  | 0 (0.0%)                     | 0 (0.0%)           | 0 (0.0%)      |
| Vitamin K Antagonist | 90 (27.7%)                   | 90 (27.2%)         | 180 (27.4%)   |
| NOAC                 | 199 (61.2%)                  | 203 (61.3%)        | 402 (61.3%)   |

NOAC Novel oral anticoagulants. EAST-AFNET4 indicates Early Treatment for Atrial Fibrillation for Stroke Prevention Trial.

**Supplemental Table XII.** Background therapy of EAST-AFNET4 heart failure patients by randomized groups at discharge from baseline visit: antihypertensive therapy and heart failure therapy.

|              |                                                                          | Early rhythm control<br>(N=396) | Usual care<br>(N=402) | Total (N=798) |
|--------------|--------------------------------------------------------------------------|---------------------------------|-----------------------|---------------|
| Baseline     | None                                                                     | 97 (24.6%)                      | 91 (22.6%)            | 188 (23.6%)   |
|              | Combinations                                                             | 56 (14.2%)                      | 45 (11.2%)            | 101 (12.7%)   |
|              | Mineralocorticoid receptor antagonists<br>(Spironolactone or Eplerenone) | 4 (1.0%)                        | 5 (1.2%)              | 9 (1.1%)      |
|              | Sacubitril, Valsartan, and ACE inhibitors                                | 136 (34.5%)                     | 165 (41.0%)           | 301 (37.8%)   |
|              | Angiotensin II receptor blocker                                          | 101 (25.6%)                     | 96 (23.9%)            | 197 (24.7%)   |
| 12<br>months | None                                                                     | 95 (27.8%)                      | 83 (23.9%)            | 178 (25.8%)   |
|              | Combinations                                                             | 44 (12.9%)                      | 37 (10.6%)            | 81 (11.7%)    |
|              | Mineralocorticoid receptor antagonists<br>(Spironolactone or Eplerenone) | 12 (3.5%)                       | 5 (1.4%)              | 17 (2.5%)     |
|              | Sacubitril, Valsartan, and ACE inhibitors                                | 101 (29.5%)                     | 133 (38.2%)           | 234 (33.9%)   |
|              | Angiotensin II receptor blocker                                          | 90 (26.3%)                      | 90 (25.9%)            | 180 (26.1%)   |
| 24<br>months | None                                                                     | 89 (27.4%)                      | 77 (23.3%)            | 166 (25.3%)   |
|              | Combinations                                                             | 44 (13.5%)                      | 36 (10.9%)            | 80 (12.2%)    |
|              | Mineralocorticoid receptor antagonists<br>(Spironolactone or Eplerenone) | 10 (3.1%)                       | 7 (2.1%)              | 17 (2.6%)     |
|              | Sacubitril, Valsartan, and ACE inhibitors                                | 91 (28.0%)                      | 123 (37.2%)           | 214 (32.6%)   |
|              | Angiotensin II receptor blocker                                          | 91 (28.0%)                      | 88 (26.6%)            | 179 (27.3%)   |

**EAST-AFNET4 indicates Early Treatment for Atrial Fibrillation for Stroke Prevention Trial.**

**Supplemental Table XIII.** Background therapy of EAST-AFNET4 heart failure patients by randomized groups at discharge from baseline visit: rate control therapy.

|                        | Early rhythm control (N=396) | Usual care (N=402) | Total (N=798) |
|------------------------|------------------------------|--------------------|---------------|
| Baseline               |                              |                    |               |
| None                   | 57 (14.5%)                   | 36 (9.0%)          | 93 (11.7%)    |
| Combinations           | 23 (5.8%)                    | 40 (10.0%)         | 63 (7.9%)     |
| Digoxin or Digitoxin   | 2 (0.5%)                     | 1 (0.2%)           | 3 (0.4%)      |
| Verapamil or Diltiazem | 3 (0.8%)                     | 4 (1.0%)           | 7 (0.9%)      |
| Beta Blocker           | 309 (78.4%)                  | 321 (79.9%)        | 630 (79.1%)   |
| 12 months              |                              |                    |               |
| None                   | 88 (25.7%)                   | 44 (12.6%)         | 132 (19.1%)   |
| Combinations           | 9 (2.6%)                     | 32 (9.2%)          | 41 (5.9%)     |
| Digoxin or Digitoxin   | 5 (1.5%)                     | 2 (0.6%)           | 7 (1.0%)      |
| Verapamil or Diltiazem | 5 (1.5%)                     | 3 (0.9%)           | 8 (1.2%)      |
| Beta Blocker           | 235 (68.7%)                  | 267 (76.7%)        | 502 (72.8%)   |
| 24 months              |                              |                    |               |
| None                   | 97 (29.8%)                   | 47 (14.2%)         | 144 (22.0%)   |
| Combinations           | 12 (3.7%)                    | 31 (9.4%)          | 43 (6.6%)     |
| Digoxin or Digitoxin   | 0 (0.0%)                     | 2 (0.6%)           | 2 (0.3%)      |
| Verapamil or Diltiazem | 2 (0.6%)                     | 3 (0.9%)           | 5 (0.8%)      |
| Beta Blocker           | 214 (65.8%)                  | 248 (74.9%)        | 462 (70.4%)   |

ACE Angiotensin Converting Enzyme. AF atrial fibrillation. EAST-AFNET4 indicates Early Treatment for Atrial Fibrillation for Stroke Prevention Trial.

**Supplemental Table XIV.** Impact of digitoxin at baseline in EAST-AFNET4 heart failure patients.

| <b>Outcome</b>                               | <b>Digitoxin</b> | <b>No Digitoxin</b> | <b>Effect</b>         | <b>p-value</b> |
|----------------------------------------------|------------------|---------------------|-----------------------|----------------|
| First primary outcome                        | 15/285 (5.3)     | 209/3014 (6.9)      | 0.75 (0.43 to 1.30)   | 0.31           |
| Second primary outcome                       | 6.72±25.50       | 8.01±25.97          | 0.75(0.47 to 1.19)    | 0.22           |
| Change in left ventricular ejection fraction | 5.30±11.65       | 5.12±11.09          | -1.24 (-3.85 to 1.38) | 0.36           |

**EAST-AFNET4 indicates Early Treatment for Atrial Fibrillation for Stroke Prevention Trial.**

**Supplemental Table XV.** Impact of digitoxin at baseline in EAST-AFNET4 heart failure patients as per LVEF subgroup.

| Outcome                                              | Subgroup  | Digitoxin   | No Digitoxin   | Effect                | P-value | p-value interaction (between digitoxin indicator and LVEF category) |
|------------------------------------------------------|-----------|-------------|----------------|-----------------------|---------|---------------------------------------------------------------------|
| First primary outcome                                | reduced   | 4/51 (7.8)  | 52/436 (11.9)  | 0.66 (0.22 to 1.91)   | 0.4377  | 0.95                                                                |
|                                                      | mid-range | 5/112 (4.4) | 46/782 (5.9)   | 0.82 (0.31 to 2.14)   | 0.6858  |                                                                     |
|                                                      | preserved | 6/107 (5.6) | 107/1765 (6.1) | 0.78 (0.33 to 1.84)   | 0.5741  |                                                                     |
| Second primary outcome - nights spent in hospital/yr | reduced   | 23.77±30.81 | 23.94±36.80    | 1.49 (0.54 to 4.13)   | 0.4384  | 0.08                                                                |
|                                                      | mid-range | 8.12±10.21  | 20.11±30.18    | 0.38 (0.18 to 0.80)   | 0.0111  |                                                                     |
|                                                      | preserved | 17.79±10.21 | 19.61±29.12    | 0.76 (0.39 to 1.49)   | 0.4214  |                                                                     |
| Change in left ventricular ejection fraction         | reduced   | 17.31±14.18 | 17.78±11.81    | -0.72 (-7.20 to 5.75) | 0.8265  | 0.67                                                                |
|                                                      | mid-range | 6.61±8.36   | 9.29±9.89      | -2.73 (-7.01 to 1.55) | 0.2117  |                                                                     |
|                                                      | preserved | -0.54±7.28  | -0.27±8.42     | -0.11 (-4.00 to 3.79) | 0.9576  |                                                                     |

LVEF Left ventricular ejection fraction. EAST-AFNET4 indicates Early Treatment for Atrial Fibrillation for Stroke Prevention Trial.

**Supplemental Table XVI.** Change in NYHA class at 24 months in EAST-AFNET4 heart failure patients by randomized groups.

| <b>LVEF category</b> | <b>NYHA change 24 months</b> | <b>Early rhythm control</b> | <b>Usual care</b> |
|----------------------|------------------------------|-----------------------------|-------------------|
| reduced              | Improved                     | 18/46 (39.13)               | 27/54 (50.00)     |
|                      | Unchanged                    | 21/46 (45.65)               | 20/54 (37.04)     |
|                      | Worsened                     | 7/46 (15.22)                | 7/54 (12.96)      |
| mid-range            | Improved                     | 45/96 (46.88)               | 25/80 (31.25)     |
|                      | Unchanged                    | 34/96 (35.42)               | 40/80 (50.00)     |
|                      | Worsened                     | 17/96 (17.71)               | 15/80 (18.75)     |
| preserved            | Improved                     | 110/181 (60.77)             | 94/191 (49.21)    |
|                      | Unchanged                    | 61/181 (33.70)              | 81/191 (42.41)    |
|                      | Worsened                     | 10/181 (5.52)               | 16/191 (8.38)     |

LVEF Left ventricular ejection fraction. NYHA class New York Heart Association classification of symptoms in heart failure patients. EAST-AFNET4 indicates Early Treatment for Atrial Fibrillation for Stroke Prevention Trial.

**Supplemental Table XVII. Complete case analysis of EAST-AFNET4 heart failure patients for secondary outcomes where imputation was necessary.**

| Outcome                                                                      | Early rhythm control | Usual care      | Treatment effect      | p-value |
|------------------------------------------------------------------------------|----------------------|-----------------|-----------------------|---------|
| Change in left ventricular ejection fraction;<br>Number of observations: 597 | 5.6±11.7             | 4.4±11.5        | 0.84 (-0.57 to 2.25)  | 0.24    |
| Change in EQ-5D score;<br>Number of observations: 486                        | 3.2±17.1             | 1.8±18.3        | 2.16 (-0.54 to 4.86)  | 0.12    |
| Change in SF-12 Mental Score;<br>Number of observations: 492                 | 1.2±11.0             | 3.0±10.6        | -0.60 (-2.15 to 0.95) | 0.44    |
| Change in SF-12 Physical Score;<br>Number of observations: 493               | 1.2±8.1              | 0.8±9.0         | 0.39 (-0.97 to 1.76)  | 0.57    |
| Change in MoCA score;<br>Number of observations: 547                         | 0.2±3.1              | 0.3±3.2         | -0.03 (-0.49 to 0.43) | 0.91    |
| Sinus rhythm — no. of patients with feature/total no. (%)                    | 246/313 (78.59)      | 175/320 (54.69) | 3.17 (2.21 to 4.54)   | <0.001  |
| Asymptomatic — no. of patients with feature/total no. (%)                    | 99/325 (30.46)       | 117/331 (35.35) | 1.36 (0.93 to 1.99)   | 0.11    |
| NYHA Improved                                                                | 173/325 (53.2)       | 150/331 (45.3)  |                       | 0.06    |
| NYHA Unchanged                                                               | 117/325 (36.0)       | 142/331 (42.9)  |                       |         |
| NYHA Worsened                                                                | 35/325 (10.8)        | 39/331 (11.8)   |                       |         |

EQ-5D score European Quality of Life 5 Dimensions score; SF-12 Short Form Health survey 12-items; MoCA score Montreal Cognitive Assessment Score. NYHA class New York Heart Association classification of symptoms in heart failure patients. EAST-AFNET4 indicates Early Treatment for Atrial Fibrillation for Stroke Prevention Trial.

## Supplemental Figures

**Supplemental Figure I.** Nights spent in hospital of EAST-AFNET4 heart failure patients by randomized groups.

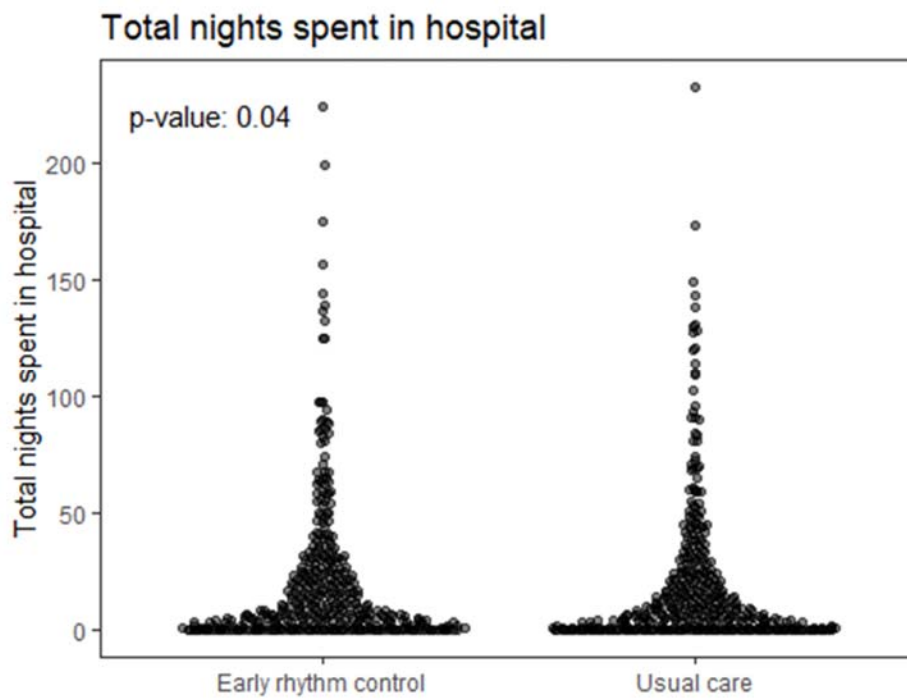



**Supplemental Figure II.** Forest plot for subgroup analysis of EAST-AFNET4 heart failure patients by randomized groups. Interaction p-value between treatment group and subgroups listed on the left is given.

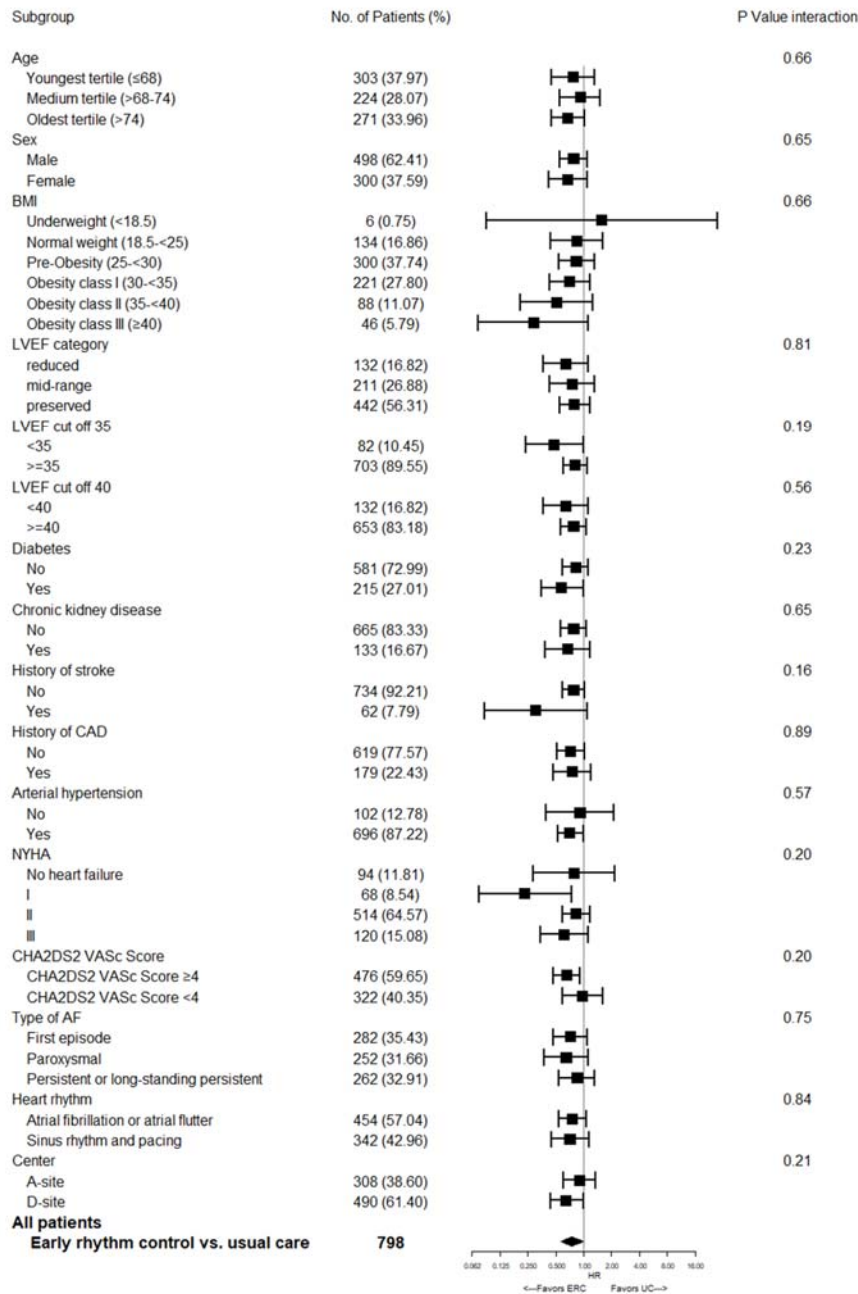

BMI Body mass index; LVEF Left ventricular function; CAD Coronary artery disease; NYHA class New York Heart Association classification of symptoms in heart failure patients; AF atrial fibrillation; A-site Ablation site; D-site study site without on-site ablation ('drug site'); EAST-AFNET4 indicates Early Treatment for Atrial Fibrillation for Stroke Prevention Trial.

**Supplemental Figure III.** Outcome of EAST-AFNET4 heart failure patients modelled after the primary endpoint of the CASTLE-AF trial by randomized groups.

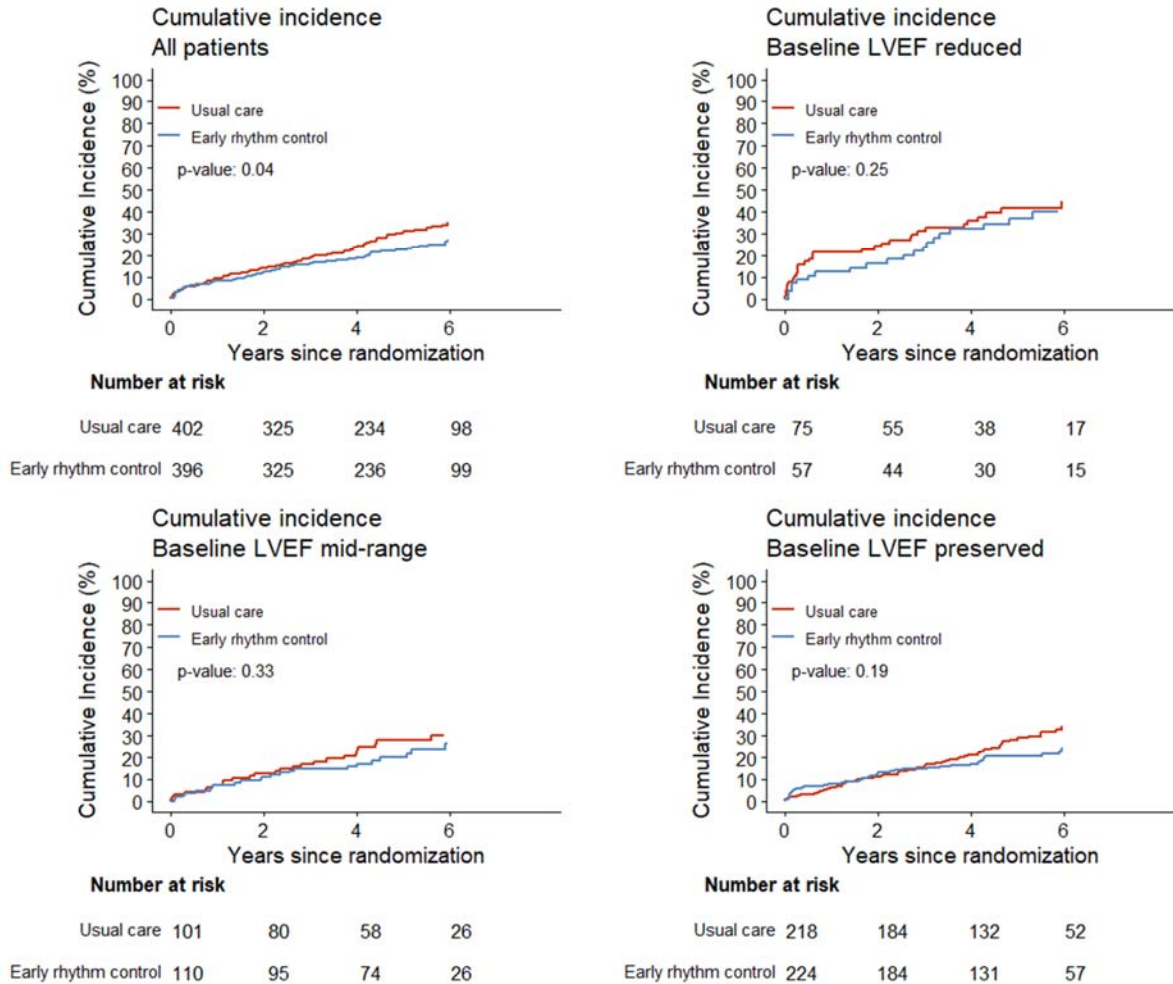

Cumulative-Incidence Curves for the effects of early rhythm control on the modelled “CASTLE-AF” like outcome.

LVEF Left ventricular ejection fraction. EAST-AFNET4 indicates Early Treatment for Atrial Fibrillation for Stroke Prevention Trial. CASTLE-AF indicates Catheter Ablation versus Standard Conventional Therapy in Patients with Left Ventricular Dysfunction and Atrial Fibrillation Trial

**Supplemental Figure IV.** Outcome of EAST-AFNET4 heart failure patients using a “CABANA-like” composite endpoint including death, disabling stroke, serious bleeding, or cardiac arrest by randomized groups.

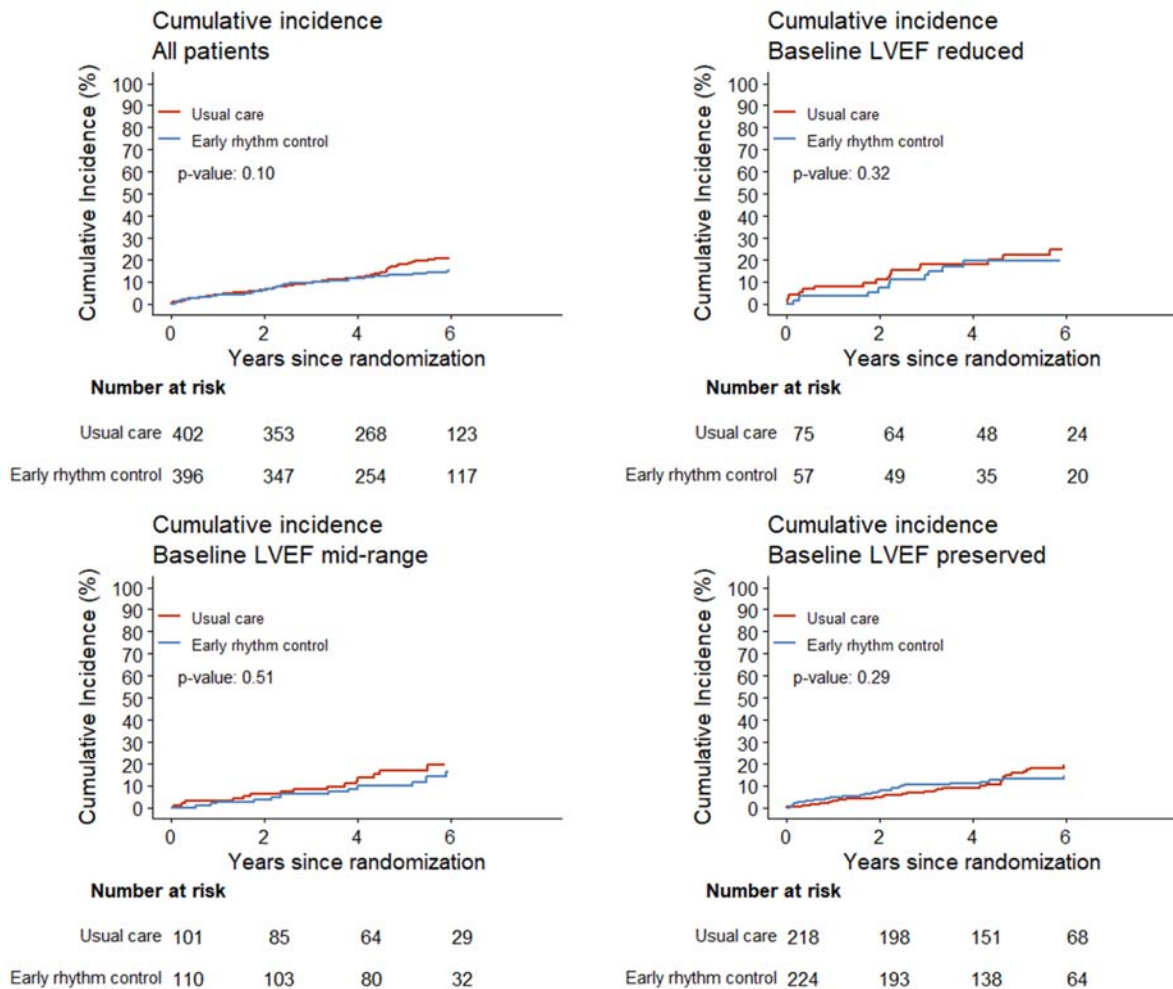

Cumulative-Incidence Curves for the effects of early rhythm control on the modelled “CABANA-like” outcome.

LVEF Left ventricular ejection fraction. EAST-AFNET4 indicates Early Treatment for Atrial Fibrillation for Stroke Prevention Trial. CABANA indicates Catheter Ablation Versus Antiarrhythmic Drug Therapy for Atrial Fibrillation Trial.

**Supplemental Figure V.** Sinus rhythm of EAST-AFNET4 heart failure patients over time by randomized groups.

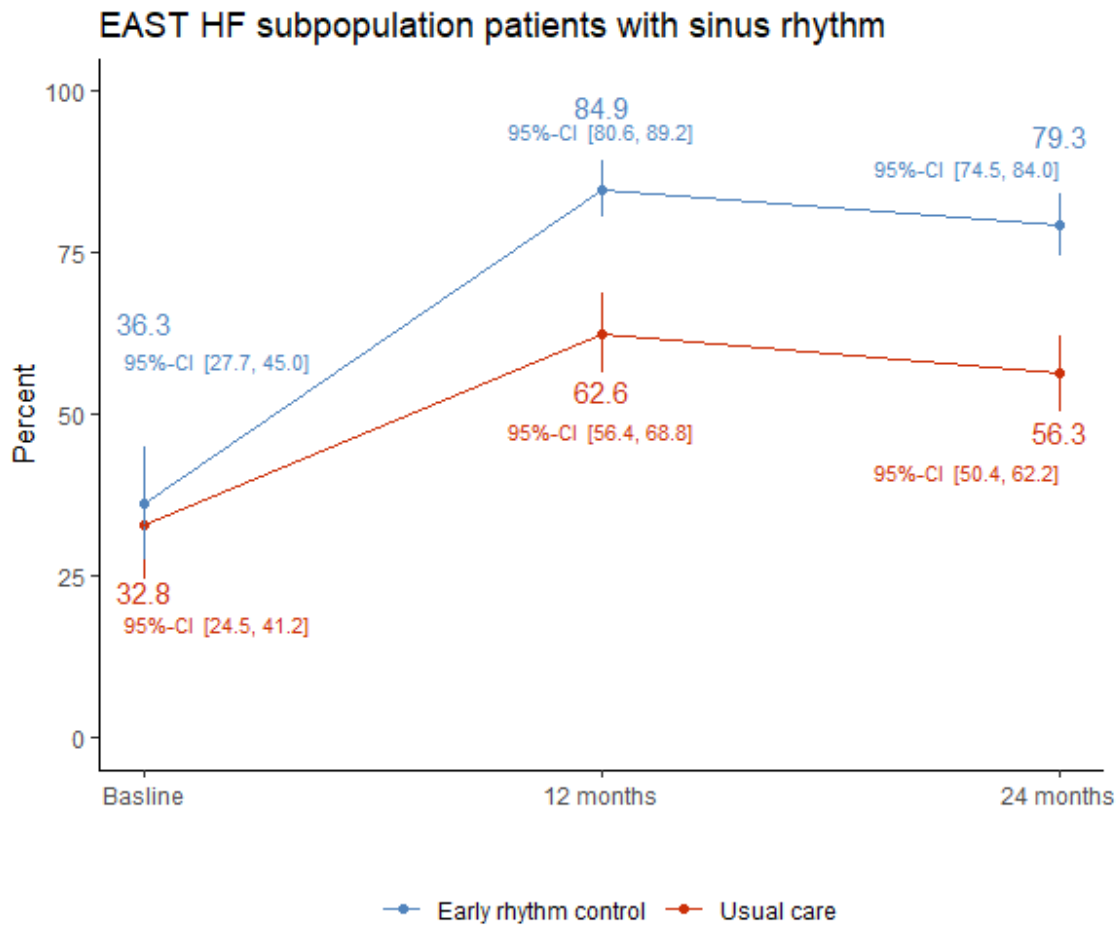

HF Heart failure; EAST-AFNET4 indicates Early Treatment for Atrial Fibrillation for Stroke Prevention Trial.

**Supplemental Figure VI.** Use of atrial fibrillation ablation and antiarrhythmic drugs over time in patients with early rhythm control as compared to usual care.

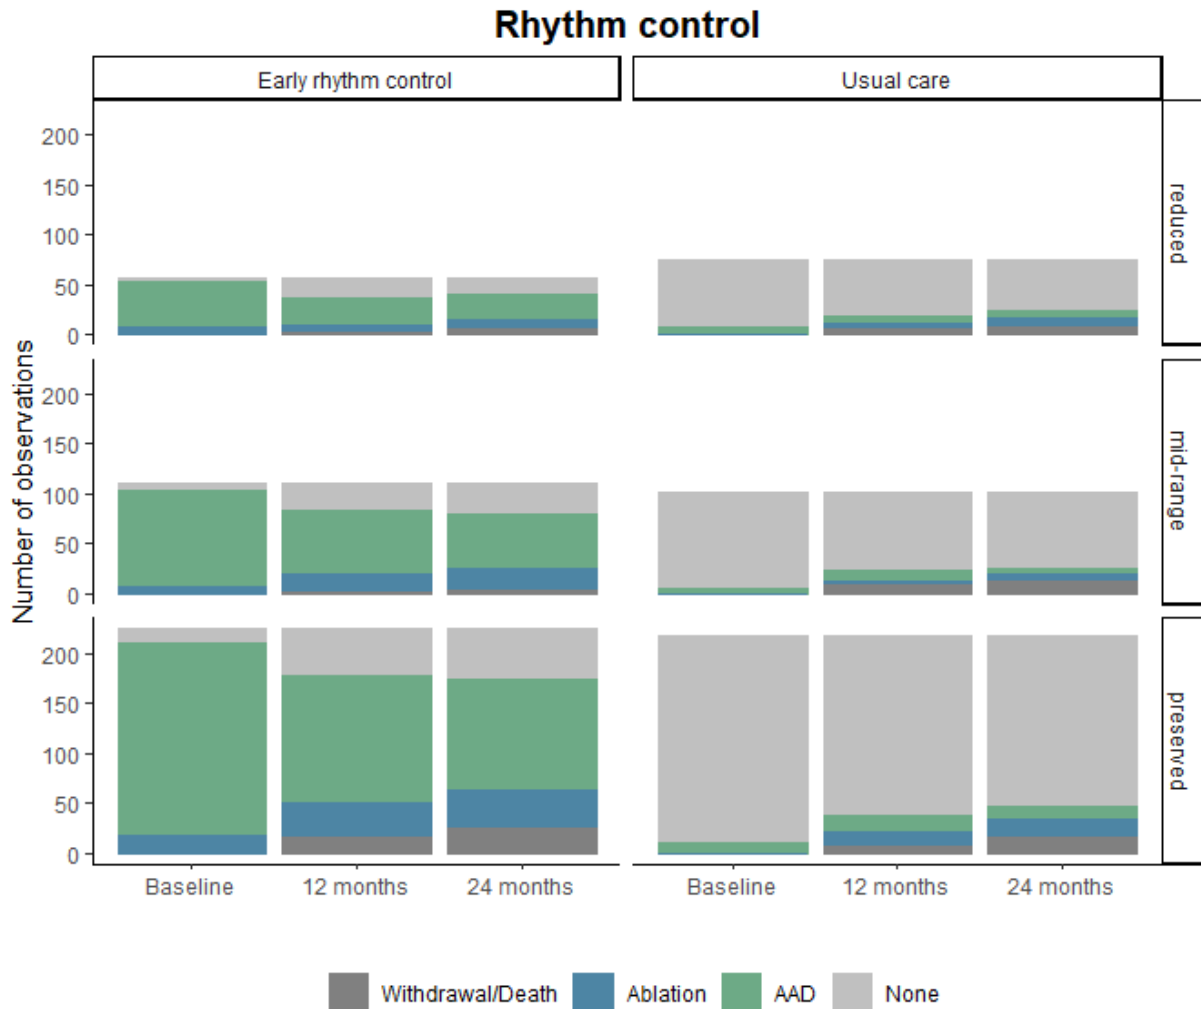

AF Atrial fibrillation; AAD antiarrhythmic drug. The majority of heart failure patients assigned to early rhythm-control therapy was initially treated with antiarrhythmic drugs, most often flecainide in patients with HFpEF and Amiodarone in patients with HFmrEF or HFrEF. At the 2-year follow-up, 257 of the patients (64.9%) who had been randomly assigned to early rhythm control therapy were still receiving rhythm-control therapy (67 patients treated with atrial fibrillation ablation and 190 treated with antiarrhythmic drugs), and only 55 patients (13.7%) who had been randomly assigned to usual care (30 treated with atrial fibrillation ablation and 25 treated with antiarrhythmic drugs). HFpEF Heart failure with preserved ejection fraction; HFmrEF Heart failure with mid-range ejection fraction; HFrEF Heart failure with reduced ejection fraction.

EAST-AFNET4 indicates Early Treatment for Atrial Fibrillation for Stroke Prevention Trial.

**Supplemental Figure VII.** Changes of left ventricular ejection fraction in the EAST-AFNET4 heart failure patients. Left ventricular function improved in patients randomized to early rhythm control and in patients randomized to usual care, without inter-group differences. Left ventricular ejection fraction improvement was more pronounced in patients with lower baseline ejection fraction. LVEF left ventricular ejection fraction; NYHA class New York Heart Association classification of symptoms in heart failure patients. A multivariable mixed linear regression model was used.

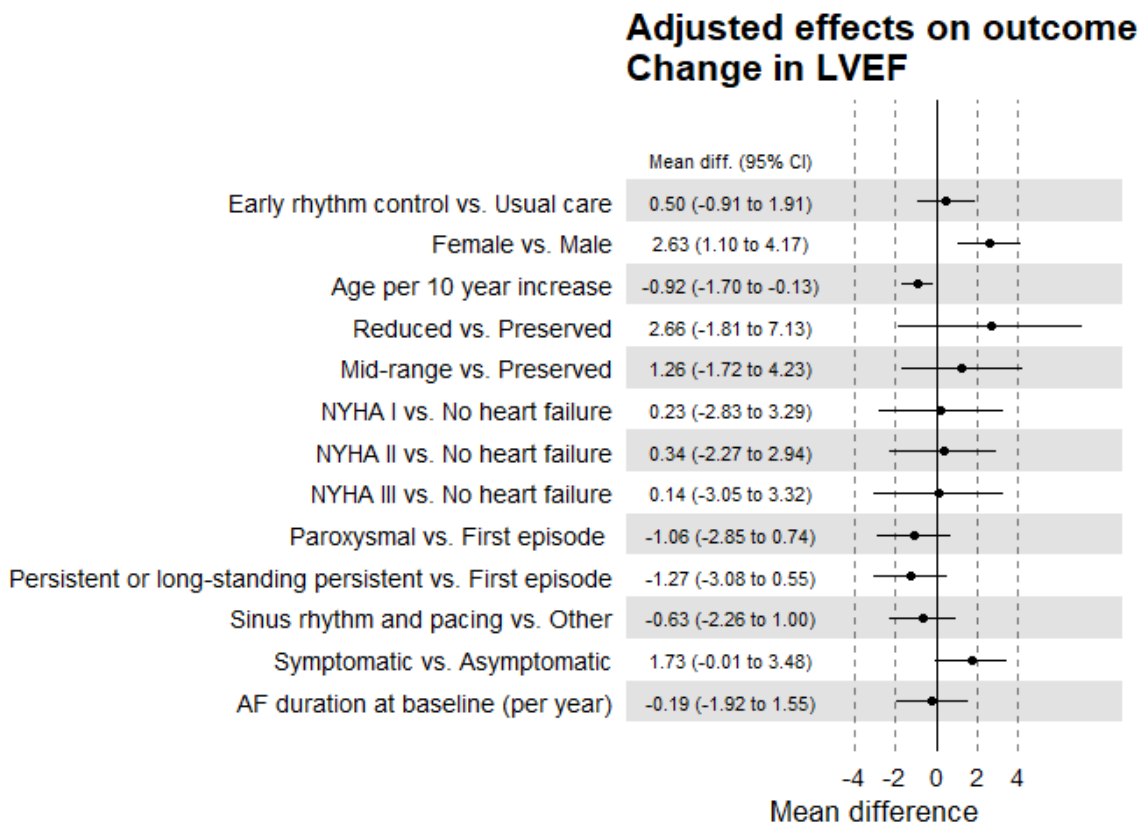

**Supplemental Figure VIII.** Systolic and diastolic blood pressure of EAST-AFNET4 heart failure patients at baseline and at 12- and 24 months by randomized groups.

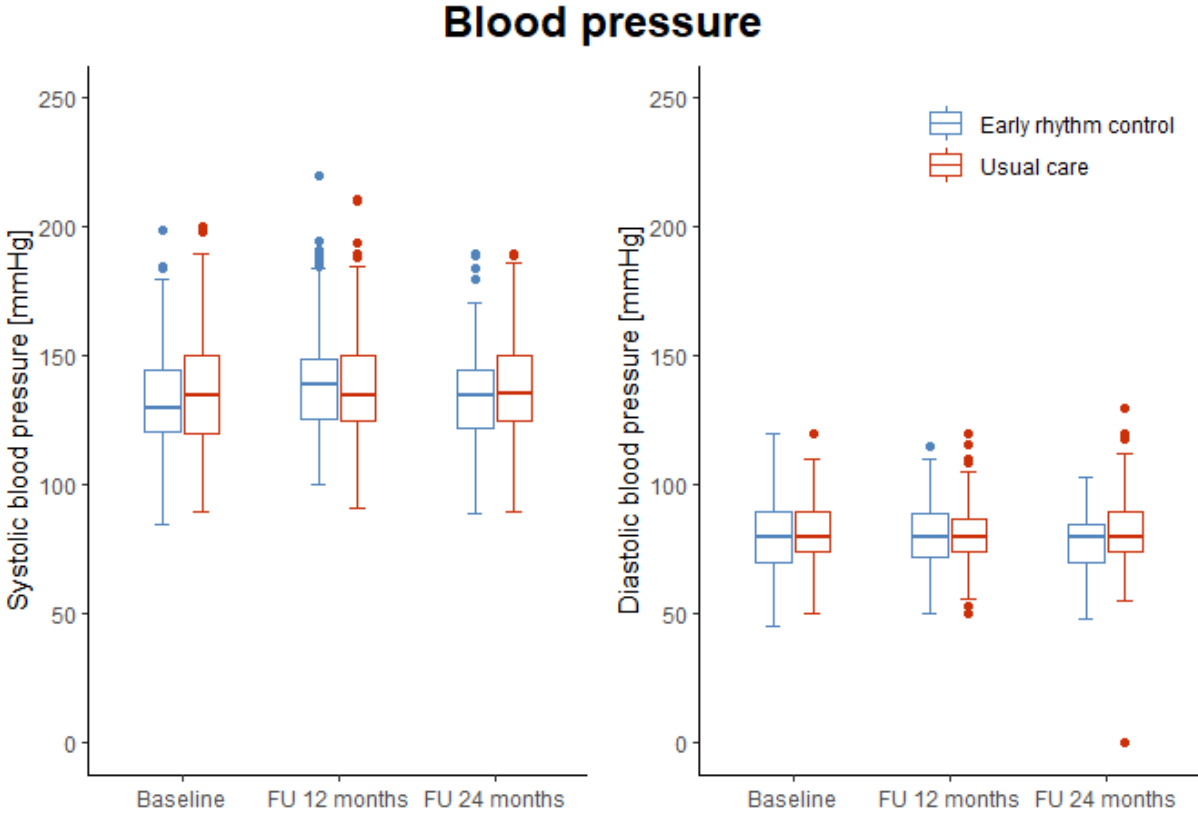

EAST-AFNET4 indicates Early Treatment for Atrial Fibrillation for Stroke Prevention Trial.

**Supplemental Figure IX.** Changes of functional heart failure status estimated according to NYHA class by randomized groups in patients randomized to early rhythm control (**IX a**) and in patients randomized to usual care (**IX b**). Changes in NYHA class were not different between randomized groups. NYHA class New York Heart Association classification of symptoms in heart failure patients.

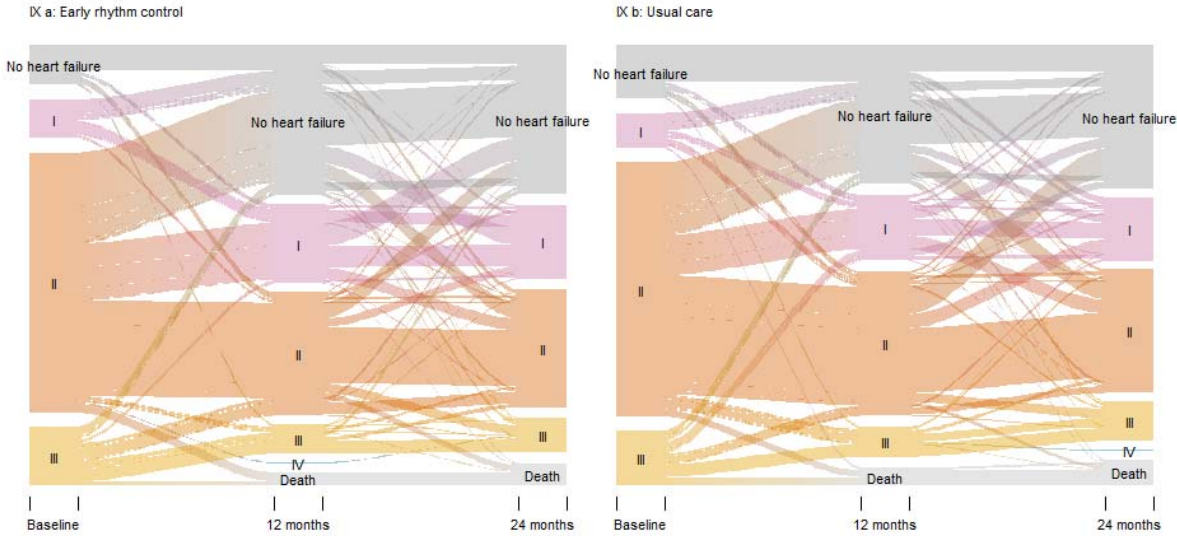

Supplement: cir-144-845-s001.pdf [file cir-144-845-s001.pdf]
